# Supplementary material for: Just at the limit: binding studies with neutral brominated terphenyl-derived halogen bond donors
Source: Royal Society of Chemistry journal article supplement (doi:10.1039/d2ce01629j), 2023-01-01
Supplement: d2ce01629j2.pdf [file d2ce01629j2.pdf]

# CrystEngComm

## Supporting Information

### **Just at the limit: binding studies with neutral brominated terphenyl-derived halogen bond donors**

Julian Stoesser<sup>a</sup>, Elric Engelage<sup>a</sup>, Debora Belmonte<sup>a</sup> and Stefan M. Huber<sup>\*a</sup>

a) Department of Chemistry and Biochemistry, Ruhr-Universität Bochum, Universitätsstraße 150, 44801 Bochum, Germany. E-mail: [stefan.m.huber@rub.de](mailto:stefan.m.huber@rub.de).

## Table of Contents:

|                                          |     |
|------------------------------------------|-----|
| A.) Synthesis and Experimental Data..... | S 3 |
| B.) Structural Characterization.....     | S 9 |
| C.) NMR-Spectra .....                    | S30 |
| D.) Titration Experiments.....           | S35 |
| E.) DFT Calculation Data.....            | S41 |
| F.) References.....                      | S42 |

## A.) Synthesis and Experimental Data

### A.1) General Information

#### A.1.1) Chemicals

All the used chemicals were obtained from *ABCR*, *Alfa Aesar*, *Carbolutions*, *Fluorochem*, *Merck/Sigma Aldrich* or *VWR*. Commercially available reagents and starting materials were unless mentioned otherwise, used without further purification. Solvents that were used in moisture sensitive experiments were taken from a solvent drying system by *M.Braun* (type: *MB SPS-800*) and stored over molecular sieve. Methanol, acetonitrile, and chloroform were bought in peptide grade quality and also dried over molecular sieves. Other solvents were bought in technical grade quality and used after single distillation.

For reactions including oxygen or moisture sensitive reagents, glassware was dried under high-vacuum conditions ( $10^{-2}$  mbar) and procedures were carried out under an argon atmosphere. Reagents were injected via a septum or added under argon counterflow.

#### A.1.2) Appliances and materials

Thin layer chromatography (TLC) was performed on plates from *Merck* (silica gel 60, F254). Detection of the substances was obtained by fluorescence detection under UV light (wavelength  $\lambda = 254$  nm). The corresponding  $R_f$  values and solvents used as eluents are listed in the experimental part. Column chromatographies were performed with silica gel (grain size 0.04-0.063 cm, *Merck*, *Si60*). The used eluent relations are listed with the respective experiments.

$^{19}\text{F}$  and  $^{13}\text{C}$ -Nuclear magnetic resonance spectra (NMR spectra) were recorded on either Bruker Avance III 300, DPX 250 or DRX 400 spectrometers at 25°C. All shift values are in ppm and all coupling constants (J) are printed in Hertz (Hz) with their multiplicity: s (singlet), d (doublet), t (triplet), q (quartet), m (multiplet), dd (doublet of doublet).

GC/MS spectra were measured on an Agilent 7820gc/5977sd GC/MS System using  $\text{H}_2$  as carrier gas equipped with an Agilent HP5MS.

Infrared spectra were measured on a Shimadzu FTIR-8400s spectrometer equipped with a Specac Quest ATR unit.

Elemental analyses were performed on a *vario MICRO cube* from Elementar Analysensysteme GmbH.

## A.2) Synthesis of the halogen bond donors

### A.2.1) Bis-1,3-(2,6-dibromotrifluorophenyl)-tetrafluorobenzene (1,3-Ter<sup>4Br</sup>)

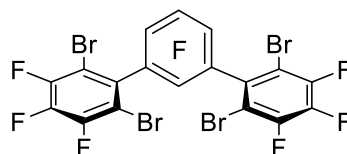

A 100 ml round bottom flask was charged with 30 ml (339.84 mmol, 139.41 eq) of trifluoromethanesulfonic acid and cooled to 0 °C. Then 1.0 g (2.44 mmol, 1 eq) bis-1,3-(3,4,5-trifluorophenyl)-tetrafluorobenzene was added. Over the course of 1 hour 3.47 g (19.50 mmol, 8 eq) N-bromosuccinimide was added in portions and the reaction mixture turned subsequently dark brown. The suspension was stirred overnight and allowed to warm to room temperature. After that, the reaction mixture was poured onto crushed ice and the aqueous phase was extracted three times with diethyl ether. The combined organic phases were neutralized with saturated NaHCO<sub>3</sub>-solution, washed with saturated Na<sub>2</sub>S<sub>2</sub>O<sub>3</sub> and NaCl-solution and dried over MgSO<sub>4</sub>. After removing the solvent under reduced pressure, a yellow residue was obtained. This residue was purified by column chromatography using petroleum ether as eluent. Thus 2,2'',6,6''-Tetrabromodecafluoro-1,3-terphenyl was obtained as a white crystalline solid in 40% (715 mg, 0.98 mmol) yield.

**<sup>19</sup>F NMR** (250 MHz, Chloroform-*d*)

$\delta$  = -115.63 (d,  $J$  = 10.8 Hz, 1F), -120.91 (d,  $J$  = 21.1 Hz, 4F), -129.17 (d,  $J$  = 22.2 Hz, 2F), -149.74 (t,  $J$  = 21.1 Hz, 2F), -161.63 (td,  $J$  = 22.1, 10.8 Hz, 1F)

**<sup>13</sup>C NMR** (63 MHz, Chloroform-*d*)

$\delta$  = 152.37 (dtd,  $J$  = 249.2, 6.7, 3.6 Hz), 149.32 (dddd,  $J$  = 255.6, 11.5, 8.6, 5.9 Hz), 148.66 (ddd,  $J$  = 252.5, 11.7, 3.8 Hz), 141.28 (dt,  $J$  = 262.4, 16.9 Hz), 137.90 (dtd,  $J$  = 253.0, 15.7, 5.3 Hz), 126.30 (d,  $J$  = 3.2 Hz), 114.36-112.09 (m), 110.16-108.03 (m).

**IR-Peaks [cm<sup>-1</sup>]:** 461.0; 499.7; 582.5; 601.8; 642.3; 682.8; 721.4; 729.1; 744.5; 758.0; 877.6; 993.3; 1074.4; 1107.1; 1124.5; 1226.7; 1259.5; 1330.9; 1340.5; 1411.9; 1475.5; 1585.5; 1602.8; 1645.3.

**R<sub>f</sub>-value (Petrol ether (40-60°)):** 0.65

**EI-MS:**

m/z [+]  
calc. = 725.8 [M<sup>+</sup>]    found = 725.8 [M<sup>+</sup>]

**Elemental Analysis:**

calc. C = 29.79    found = 30.35

**Melting point:** 163.5 °C

A.2.2) Bis-1,4-(2,6-dibromotrifluorophenyl)-tetrafluorobenzene (1,4-Ter<sup>4Br</sup>)

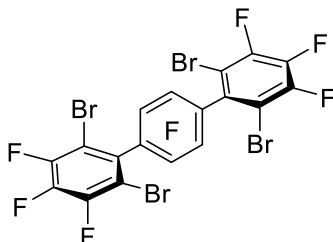

For this synthesis, the same procedure as for 1,3-Ter<sup>4Br</sup> was used except 1.0 g (2.44 mmol, 1 eq) of bis-1,4-(3,4,5-trifluorophenyl)-tetrafluorobenzene was used. This way 2,2",6,6"-Tetrabromodecafluoro-1,4-terphenyl was obtained as a white crystalline solid in 18% (309 mg, 0.43 mmol) yield.

**<sup>19</sup>F NMR** (250 MHz, Chloroform-*d*)

δ = -120.74 (d, *J* = 21.1 Hz, 4F), -138.27 (s, 4F), -149.47 (t, *J* = 21.1 Hz, 2F).

**<sup>13</sup>C NMR** (63 MHz, Chloroform-*d*)

δ = 148.58 (ddd, *J* = 252.7, 11.7, 3.8 Hz), 146.12-141.09 (m), 141.40 (td, *J* = 262.6, 16.8 Hz), 126.04 (d, *J* = 4.4 Hz), 118.88 (t, *J* = 10.4 Hz), 109.36-107.25 (m).

**IR-Peaks [cm<sup>-1</sup>]:** 640.4; 705.9; 746.5; 877.6; 979.8; 995.3; 1068.6; 1080.1; 1226.7; 1234.4; 1251.8; 1263.4; 1329.0; 1338.6; 1354.0; 1363.7; 1410.0; 1471.7; 1510.3; 1583.6; 1602.8

**R<sub>f</sub>-value (Petrol ether (40-60°)):** 0.79

**EI-MS:**

m/z [+]  
calc. = 725.8 [M<sup>+</sup>]    found = 725.8 [M<sup>+</sup>]

**Elemental analysis:**

calc. C = 29.79    found = 30.26

**Melting point:** 188.3 ° C

A.2.3) *syn*-Bis-1,3-(2-bromotetrafluorophenyl)-tetrafluorobenzene (*syn*-1,3-Ter<sup>2Br</sup>)  
*anti*-Bis-1,3-(2-bromotetrafluorophenyl)-tetrafluorobenzene (*anti*-1,3-Ter<sup>2Br</sup>)

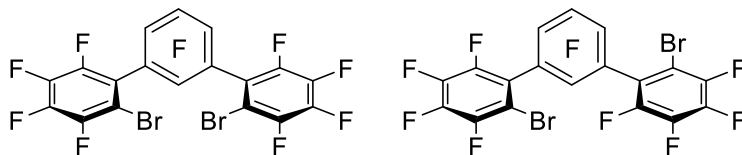

For this synthesis, the same procedure as for 1,3-Ter<sup>4Br</sup> was used except 1.0 g (2.24 mmol, 1 eq) of bis-1,3-(3,4,5,6-tetrafluorophenyl)-tetrafluorobenzene was used. A mixture of the *syn*-, the *anti*-, the partially and non-brominated compound could be obtained and it was not possible to separate them to perform the needed analysis.

A.2.4) *syn*-Bis-1,4-(2-bromotetrafluorophenyl)-tetrafluorobenzene (*syn*-1,4-Ter<sup>2Br</sup>)  
*anti*-Bis-1,4-(2-bromotetrafluorophenyl)-tetrafluorobenzene (*anti*-1,4-Ter<sup>2Br</sup>)

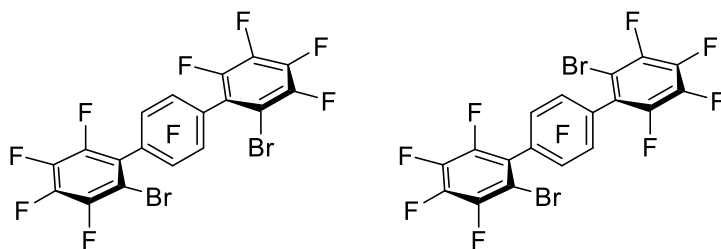

For this synthesis, the same procedure as for 1,3-Ter<sup>4Br</sup> was used except 1.0 g (2.24 mmol, 1 eq) of bis-1,4-(3,4,5,6-tetrafluorophenyl)-tetrafluorobenzene was used. A mixture of *syn*- and *anti*- Bis-1,4-(2-bromotetrafluorophenyl)-tetrafluorobenzene was obtained as a white powder in 62% (839 mg, 1,39 mmol) yield.

**“presumably” (based on iodinated analogue) *syn*-1,4-Ter<sup>2Br</sup>:**

<sup>19</sup>F NMR (250 MHz, Chloroform-*d*)

$\delta$  = -126.43 (ddd,  $J$  = 21.9, 10.0, 3.8 Hz), -133.38 (dddd,  $J$  = 21.7, 7.8, 4.3, 2.1 Hz), -137.07 (t,  $J$  = 1.7 Hz), -148.94 (ddd,  $J$  = 21.9, 20.1, 4.5 Hz), -153.65 (ddd,  $J$  = 21.7, 20.2, 3.8 Hz).

**“presumably” (based on the iodinated analogue) *anti*-1,4-Ter<sup>2Br</sup>:**

<sup>19</sup>F NMR (250 MHz, Chloroform-*d*)

$\delta = -126.39$  (ddd,  $J = 21.8, 9.7, 3.8$  Hz),  $-133.25$  (dddd,  $J = 23.7, 9.4, 4.3, 2.1$  Hz),  $-137.00$  (t,  $J = 1.7$  Hz),  $-148.94$  (ddd,  $J = 21.7, 20.1, 4.5$  Hz),  $-153.53$  (ddd,  $J = 21.6, 20.2, 3.8$  Hz).

The spectra of the known iodinated analogues show that the signals of *syn*-1,4-Ter<sup>2I</sup> are further upfield-shifted than those of *anti*-1,4-Ter<sup>2I</sup>. Based on this, the spectra were assigned to the isomers.

<sup>13</sup>C NMR (63 MHz, Chloroform-*d*)

$\delta = 148.59-147.18$  (m),  $146.95-145.32$  (m),  $144.41-143.34$  (m),  $142.83-141.14$  (m),  $139.99$  (ddd,  $J = 17.2, 12.8, 4.1$  Hz),  $138.22$  (t,  $J = 15.2$  Hz),  $115.53-112.04$  (m),  $108.26-106.22$  (m).

Due to the overlapping peaks of *syn*- and *anti*-1,4-Ter<sup>2Br</sup>, no clear pattern can be determined. Because of that, the signals are given as multiplets.

**IR-Peaks [cm<sup>-1</sup>]:** 412.8; 707.9; 827.5; 933.5; 979.8; 1053.1; 1085.9; 1114.9; 1128.4; 1257.6; 1292.3; 1375.2; 1437.0; 1456.3; 1473.6; 1485.2; 1496.7; 1521.8; 1631.8.

**R<sub>f</sub>-value (Petrol ether (40-60°)):** 0.73

**EI-MS:**

m/z [+]  
calc. = 604 [M<sup>+</sup>]      found = 604 [M<sup>+</sup>]

**Elemental analysis:**

calc. C = 35.80      found = 35.80

**Melting point:** 177.4 ° C

The melting point refers to the mixture of *syn*- and *anti*- Bis-1,4-(2-bromotetrafluorophenyl)-tetrafluorobenzene.

A.2.5) 1,3,5-Tris-(2,6-dibromo-3,4,5-trifluorophenyl)-2,4,6-trifluorobenzene (Q-Ter<sup>6Br</sup>)

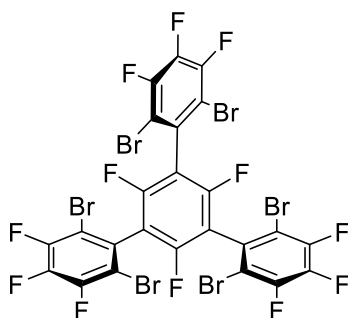

For this synthesis, the same procedure as for 1,3-Ter<sup>4Br</sup> was used except 2.10 g (4.15 mmol, 1 eq) of 1,3,5-Tris-(3,4,5-trifluorophenyl)-2,4,6-trifluorobenzene were used. 1,3,5-Tris-(2,6-dibromo-3,4,5-trifluorophenyl)-2,4,6-trifluorobenzene was obtained as white crystalline solid in 51% (486 mg, 0.48 mmol) yield.

**<sup>19</sup>F NMR** (250 MHz, Chloroform-*d*)

$\delta = -107.13$ (s, 3F),  $-121.16$  (d,  $J = 21.2$  Hz, 6F)  $-150.00$  (t,  $J = 21.1$  Hz, 3F).

**<sup>13</sup>C NMR** (63 MHz, Chloroform-*d*)

$\delta = 157.29$  (dt,  $J = 254.4, 9.3$  Hz),  $148.49$  (ddd,  $J = 252.4, 11.7, 3.8$  Hz),  $141.06$  (dt,  $J = 262.1, 16.9$  Hz),  $126.58$  (d,  $J = 4.5$  Hz),  $114.10-111.95$  (m),  $109.85-107.23$  (m).

**IR-Peaks [cm<sup>-1</sup>]:** 499.6; 609.5; 624.9; 661.6; 731.0; 877.6; 991.4; 1072.4; 1099.4; 1228.7; 1329.0; 1344.4; 1411.9; 1460.1; 1492.9; 1583.5; 1602.8; 1627.9; 1741.7.

**R<sub>f</sub>-value (Petrol ether (40-60°)):** 0.79

**EI-MS:**

m/z [+]  
calc. = 995.7 [M<sup>+</sup>]    found = 955.7 [M<sup>+</sup>]

**Elemental analysis:**

calc. C = 28.95    found = 28.91



## B.) Structural Characterization

### B.1.) Crystal Structure Determination

Crystal structure determination was carried out on a *Rigaku* XtaLAB mini, equipped with a 600 W Mo micro-fine focus glass sealed tube, graphite monochromator (Mo  $K_{\alpha}$ ) and Mercury375R CCD detector or a *Rigaku* Synergy dual source device, with Cu and Mo microfocus sealed tubes (Cu & Mo  $K_{\alpha}$ ) using mirror monochromators and a HyPix-6000HE: Hybrid photon counting X-ray detector. Crystals were mounted in *Hampton* CryoLoops using Parabar/Paratone or *GE/Bayer* silicone grease. Data on both systems was recorded and reduced using the CrysAlisPro<sup>[1]</sup> Software. Structures were solved using WinGX<sup>[2]</sup> in combination with ShelXT<sup>[3]</sup> and refined with shelXle and ShelXL. Tables for the publication were generated using a modified version of CifTab. Pictures of the structures were generated with Diamond 4<sup>[4]</sup>.

### B.2.) Crystal data

**Table S1:** Crystal data and structure refinement

| Compound                        | <i>m</i> -5 <sup>4</sup> Br                     | <i>p</i> -5 <sup>4</sup> Br                     | <i>p</i> -5 <sup>2</sup> Br - <i>syn</i>        | <i>p</i> -5 <sup>2</sup> Br - <i>anti</i>       |
|---------------------------------|-------------------------------------------------|-------------------------------------------------|-------------------------------------------------|-------------------------------------------------|
| Empirical formula               | C <sub>18</sub> Br <sub>4</sub> F <sub>10</sub> | C <sub>18</sub> Br <sub>4</sub> F <sub>10</sub> | C <sub>18</sub> Br <sub>2</sub> F <sub>12</sub> | C <sub>18</sub> Br <sub>2</sub> F <sub>12</sub> |
| CCDC                            | 2183888                                         | 2183890                                         | 2183892                                         | 2183891                                         |
| Formula weight<br>[g/mol]       | 725.82                                          | 725.82                                          | 603.98                                          | 604                                             |
| Crystal system                  | Monoclinic                                      | Monoclinic                                      | Orthorhombic                                    | Triclinic                                       |
| Space group                     | C2/c (15)                                       | P2 <sub>1</sub> /n (14)                         | Pbca (61)                                       | P-1 (2)                                         |
| Lattice parameters<br>[Å]       |                                                 |                                                 |                                                 |                                                 |
| a                               | 13.3920(12)                                     | 7.7805(5)                                       | 7.8665(2)                                       | 5.4453(6)                                       |
| b                               | 10.6012(12)                                     | 12.9312(8)                                      | 20.2579(3)                                      | 7.8772(6)                                       |
| c                               | 14.1313(13)                                     | 16.6717(14)                                     | 22.2780(4)                                      | 11.0644(9)                                      |
| $\alpha$                        | 90                                              | 90                                              | 90                                              | 71.140(7)                                       |
| $\beta$                         | 101.079(9)                                      | 94.599(7)                                       | 90                                              | 86.893(8)                                       |
| $\gamma$                        | 90                                              | 90                                              | 90                                              | 79.296(8)                                       |
| Density [g/cm <sup>3</sup> ]    | 2.449                                           | 2.444                                           | 2.260                                           | 2.273                                           |
| Crystal size [mm <sup>3</sup> ] | 0.280 x 0.184 x<br>0.143                        | 0.617 x 0.361 x<br>0.166                        | 0.090 x 0.059 x<br>0.038                        | 0.485 x 0.259 x<br>0.124                        |
| Volume [Å <sup>3</sup> ]        | 1968.8(3)                                       | 1972.8(2)                                       | 3550.19(12)                                     | 441.29(7)                                       |
| Z                               | 4                                               | 4                                               | 8                                               | 1                                               |
| Temperature [K]                 | 170(2)                                          | 170(2)                                          | 169.99(12)                                      | 170(2)                                          |

| Diffraction Device                                                | XtaLAB Mini (ROW)                               | XtaLAB Mini (ROW)                               | XtaLAB Synergy, Dualflex, HyPix                  | XtaLAB Mini (ROW)                               |
|-------------------------------------------------------------------|-------------------------------------------------|-------------------------------------------------|--------------------------------------------------|-------------------------------------------------|
| Radiation type                                                    | 0.71073 Å ( Mo K/ fine-focus sealed X-ray tube) | 0.71073 Å ( Mo K/ fine-focus sealed X-ray tube) | 1.54184 Å ( Cu K/ micro-focus sealed X-ray tube) | 0.71073 Å ( Mo K/ fine-focus sealed X-ray tube) |
| F (000)                                                           | 1352                                            | 1352                                            | 2288                                             | 286                                             |
| Absorption coefficient [mm <sup>-1</sup> ]                        | 8.273                                           | 8.257                                           | 7.029                                            | 4.719                                           |
| Absorption correction                                             | Gaussian                                        | Gaussian                                        | Gaussian                                         | Gaussian                                        |
| Measurement range                                                 | 2.7 – 26.0                                      | 2.9 – 26.0                                      | 4.0 – 66.5                                       | 2.8 – 26.5                                      |
| Index range                                                       | -16 < h < 14<br>-9 < k < 13<br>-17 < l < 11     | -9 < h < 9<br>-15 < k < 15<br>-24 < l < 24      | -9 < h < 9<br>-24 < k < 23<br>-26 < l < 13       | -6 < h < 6<br>-9 < k < 9<br>-13 < l < 13        |
| Measured reflexes                                                 | 3519                                            | 8627                                            | 12960                                            | 2671                                            |
| Independent                                                       | 1935                                            | 3876                                            | 3127                                             | 1811                                            |
| Observed                                                          | 1513                                            | 3138                                            | 2844                                             | 1660                                            |
| R (int)                                                           | 0.0220                                          | 0.0226                                          | 0.0341                                           | 0.0209                                          |
| Completeness (%) / theta (°)                                      | 99.9 / 25.242                                   | 99.9 / 25.242                                   | 100.0 / 66.494                                   | 99.4 / 25.242                                   |
| Transmission (min/max)                                            | 0.253 / 0.504                                   | 0.102 / 0.456                                   | 0.709 / 0.943                                    | 0.283 / 0.752                                   |
| R1 (observed/all)                                                 | 0.0308 / 0.0471                                 | 0.0330 / 0.0466                                 | 0.0471 / 0.0523                                  | 0.0326 / 0.0377                                 |
| wR2 (observed/all)                                                | 0.0675 / 0.0751                                 | 0.0756 / 0.0822                                 | 0.1051 / 0.1074                                  | 0.0818 / 0.0865                                 |
| GooF = S                                                          | 1.046                                           | 1.021                                           | 1.188                                            | 1.093                                           |
| Rest electron density max./min. [e <sup>-</sup> /Å <sup>3</sup> ] | -0.270 / 0.571                                  | -0.539 / 1.093                                  | -0.561 / 0.469                                   | -0.414 / 0.733                                  |

| Compound                                                          | <i>m</i> -5 <sup>4Br</sup> TDAI                                                 | <i>p</i> -5 <sup>4Br</sup> TDAI                                                 |
|-------------------------------------------------------------------|---------------------------------------------------------------------------------|---------------------------------------------------------------------------------|
| Empirical formula                                                 | C <sub>27</sub> H <sub>18</sub> Br <sub>4</sub> F <sub>10</sub> IN <sub>3</sub> | C <sub>27</sub> H <sub>18</sub> Br <sub>4</sub> F <sub>10</sub> IN <sub>3</sub> |
| CCDC                                                              | 2183889                                                                         | 2183893                                                                         |
| Formula weight [g/mol]                                            | 1020.98                                                                         | 1020.98                                                                         |
| Crystal system                                                    | Orthorhombic                                                                    | Monoclinic                                                                      |
| Space group                                                       | Pbcm (57)                                                                       | C2/c (15)                                                                       |
| Lattice parameters [Å]                                            |                                                                                 |                                                                                 |
| a                                                                 | 20.3907(4)                                                                      | 21.3852(16)                                                                     |
| b                                                                 | 7.68010(10)                                                                     | 20.391(2)                                                                       |
| c                                                                 | 42.9380(10)                                                                     | 7.5673(6)                                                                       |
| α                                                                 | 90                                                                              | 90                                                                              |
| β                                                                 | 90                                                                              | 94.255(7)                                                                       |
| γ                                                                 | 90                                                                              | 90                                                                              |
| Density [g/cm <sup>3</sup> ]                                      | 2.017                                                                           | 2.061                                                                           |
| Crystal size [mm <sup>3</sup> ]                                   | 0.256 x 0.074 x 0.057                                                           | 0.947 x 0.419 x 0.220                                                           |
| Volume [Å <sup>3</sup> ]                                          | 6724.2(2)                                                                       | 3290.7(5)                                                                       |
| Z                                                                 | 8                                                                               | 4                                                                               |
| Temperature [K]                                                   | 169.99(10)                                                                      | 170(2)                                                                          |
| Diffraction Device                                                | XtaLAB Synergy, Dualflex, HyPix                                                 | XtaLAB Mini (ROW)                                                               |
| Radiation type                                                    | 1.54184 Å ( Cu K/ micro-focus sealed X-ray tube)                                | 0.71073 Å ( Mo K/ fine-focus sealed X-ray tube)                                 |
| F (000)                                                           | 3872                                                                            | 1936                                                                            |
| Absorption coefficient [mm <sup>-1</sup> ]                        | 13.782                                                                          | 5.911                                                                           |
| Absorption correction                                             | Gaussian                                                                        | Gaussian                                                                        |
| Measurement range                                                 | 3.0 – 66.5                                                                      | 2.8 – 26.5                                                                      |
| Index range                                                       | -24 < h < 24<br>-4 < k < 9<br>-50 < l < 50                                      | -26 < h < 26<br>-25 < k < 25<br>-9 < l < 9                                      |
| Measured reflexes                                                 | 39157                                                                           | 6802                                                                            |
| Independent                                                       | 5995                                                                            | 3416                                                                            |
| Observed                                                          | 5328                                                                            | 2834                                                                            |
| R (int)                                                           | 0.0505                                                                          | 0.0266                                                                          |
| Completeness (%) / theta (°)                                      | 99.7 / 66.496                                                                   | 99.9 / 25.242                                                                   |
| Transmission (min/max)                                            | 0.230 / 0.682                                                                   | 0.102 / 0.693                                                                   |
| R1 (observed/all)                                                 | 0.0442 / 0.0501                                                                 | 0.0459 / 0.0573                                                                 |
| wR2 (observed/all)                                                | 0.1022 / 0.1051                                                                 | 0.1231 / 0.1355                                                                 |
| GooF = S                                                          | 1.145                                                                           | 1.026                                                                           |
| Rest electron density max./min. [e <sup>-</sup> /Å <sup>3</sup> ] | -0.733 / 0.717                                                                  | -0,794 / 0.862                                                                  |

**Table S2:** Atomic coordinates ( $\times 10^4$ ) and equivalent isotropic displacement parameters ( $\text{\AA}^2 \times 10^3$ ) for  $m\text{-5}^{4\text{Br}}$  U(eq) is defined as one third of the trace of the orthogonalized  $U^{ij}$  tensor

|       | x       | y       | z       | U(eq) |
|-------|---------|---------|---------|-------|
| Br(1) | 6268(1) | 7466(1) | 5153(1) | 43(1) |
| F(1)  | 5141(2) | 8848(3) | 6466(2) | 58(1) |
| C(1)  | 4904(3) | 8003(4) | 4897(3) | 32(1) |
| Br(2) | 2388(1) | 7997(1) | 2663(1) | 56(1) |
| F(2)  | 3203(2) | 9721(3) | 6134(2) | 65(1) |
| C(2)  | 4539(3) | 8643(4) | 5610(3) | 40(1) |
| F(3)  | 1982(2) | 9340(3) | 4428(2) | 64(1) |
| C(3)  | 3553(4) | 9090(4) | 5442(3) | 45(1) |
| F(4)  | 5000    | 8959(3) | 2500    | 42(1) |
| C(4)  | 2931(3) | 8890(4) | 4571(3) | 44(1) |
| C(5)  | 3279(3) | 8243(4) | 3851(3) | 37(1) |
| F(5)  | 4356(2) | 5129(2) | 3921(2) | 47(1) |
| C(6)  | 4276(3) | 7788(3) | 4005(2) | 30(1) |
| F(6)  | 5000    | 3850(3) | 2500    | 49(1) |
| C(7)  | 4652(3) | 7074(4) | 3239(2) | 29(1) |
| C(10) | 5000    | 5106(5) | 2500    | 33(1) |
| C(9)  | 4670(3) | 5772(4) | 3221(3) | 34(1) |
| C(8)  | 5000    | 7697(5) | 2500    | 30(1) |

**Table S3:** Anisotropic displacement parameters ( $\text{\AA}^2 \times 10^3$ ) for  $m\text{-5}^{4\text{Br}}$ . The anisotropic displacement factor exponent takes the form:  $-2\pi^2 [h^2 a^{*2}U^{11} + \dots + 2 h k a^* b^* U^{12}]$

|       | $U^{11}$ | $U^{22}$ | $U^{33}$ | $U^{23}$ | $U^{13}$ | $U^{12}$ |
|-------|----------|----------|----------|----------|----------|----------|
| Br(1) | 38(1)    | 53(1)    | 36(1)    | 7(1)     | 0(1)     | 1(1)     |
| F(1)  | 79(2)    | 62(2)    | 30(1)    | -12(1)   | 4(1)     | -4(2)    |
| C(1)  | 35(2)    | 31(2)    | 30(2)    | 4(2)     | 8(2)     | -4(2)    |
| Br(2) | 36(1)    | 86(1)    | 41(1)    | -1(1)    | 0(1)     | 9(1)     |
| F(2)  | 88(2)    | 65(2)    | 53(2)    | -13(1)   | 40(2)    | 9(2)     |
| C(2)  | 56(3)    | 40(2)    | 24(2)    | -2(2)    | 12(2)    | -8(2)    |
| F(3)  | 50(2)    | 82(2)    | 66(2)    | -4(1)    | 25(1)    | 22(2)    |
| C(3)  | 64(3)    | 41(2)    | 39(2)    | -4(2)    | 29(2)    | 2(2)     |
| F(4)  | 62(2)    | 30(2)    | 38(2)    | 0        | 21(2)    | 0        |

|       |       |       |       |       |       |       |
|-------|-------|-------|-------|-------|-------|-------|
| C(4)  | 40(2) | 51(3) | 45(3) | 4(2)  | 20(2) | 11(2) |
| C(5)  | 37(2) | 47(3) | 27(2) | 4(2)  | 8(2)  | 4(2)  |
| F(5)  | 55(2) | 45(1) | 47(1) | 13(1) | 21(1) | -5(1) |
| C(6)  | 33(2) | 32(2) | 27(2) | 4(1)  | 10(2) | -2(2) |
| F(6)  | 49(2) | 30(2) | 71(2) | 0     | 19(2) | 0     |
| C(7)  | 28(2) | 37(2) | 23(2) | 1(2)  | 6(2)  | 1(2)  |
| C(10) | 28(3) | 28(3) | 43(3) | 0     | 6(2)  | 0     |
| C(9)  | 27(2) | 44(2) | 32(2) | 9(2)  | 7(2)  | -3(2) |
| C(8)  | 28(3) | 36(3) | 25(3) | 0     | 3(2)  | 0     |

**Table S4:** Atomic coordinates ( $\times 10^4$ ) and equivalent isotropic displacement parameters ( $\text{\AA}^2 \cdot 10^3$ ) for  $p\text{-}5^{4\text{Br}}$  U(eq) is defined as one third of the trace of the orthogonalized  $U^{ij}$  tensor

|       | x        | y       | z       | U(eq) |
|-------|----------|---------|---------|-------|
| Br(1) | 11366(1) | 4655(1) | 4245(1) | 34(1) |
| Br(2) | 8682(1)  | 8778(1) | 4073(1) | 40(1) |
| Br(3) | 5210(1)  | 7455(1) | 1627(1) | 56(1) |
| Br(4) | 4550(1)  | 3558(1) | 2933(1) | 54(1) |
| F(1)  | 13802(3) | 5706(2) | 5281(1) | 44(1) |
| F(2)  | 13928(3) | 7689(2) | 5679(1) | 52(1) |
| F(3)  | 11637(4) | 9066(2) | 5132(1) | 53(1) |
| F(4)  | 6673(3)  | 6719(2) | 4458(1) | 33(1) |
| F(5)  | 4162(3)  | 6138(2) | 3545(1) | 36(1) |
| F(6)  | 8223(3)  | 5471(2) | 1956(1) | 40(1) |
| F(7)  | 10748(3) | 6082(2) | 2863(1) | 35(1) |
| F(8)  | 2287(4)  | 6550(3) | 726(2)  | 84(1) |
| F(9)  | 631(4)   | 4729(4) | 835(2)  | 98(2) |
| F(10) | 1643(4)  | 3392(3) | 1826(2) | 86(1) |
| C(1)  | 11409(5) | 6056(3) | 4491(2) | 25(1) |
| C(2)  | 12656(5) | 6373(3) | 4984(2) | 30(1) |
| C(3)  | 12733(5) | 7392(4) | 5193(2) | 36(1) |
| C(4)  | 11548(5) | 8089(3) | 4914(2) | 36(1) |
| C(5)  | 10278(5) | 7783(3) | 4424(2) | 30(1) |
| C(6)  | 10184(4) | 6754(3) | 4206(2) | 24(1) |
| C(7)  | 8803(5)  | 6409(3) | 3697(2) | 24(1) |
| C(8)  | 7086(5)  | 6406(3) | 3846(2) | 26(1) |
| C(9)  | 5792(4)  | 6102(3) | 3375(2) | 27(1) |

|       |         |         |         |       |
|-------|---------|---------|---------|-------|
| C(10) | 6118(5) | 5770(3) | 2726(2) | 27(1) |
| C(11) | 7825(5) | 5773(3) | 2577(2) | 29(1) |
| C(12) | 9124(4) | 6084(3) | 3047(2) | 26(1) |
| C(13) | 4675(5) | 5480(3) | 2218(2) | 32(1) |
| C(14) | 4132(5) | 6154(4) | 1702(2) | 41(1) |
| C(15) | 2777(6) | 5901(5) | 1231(2) | 55(1) |
| C(16) | 1944(6) | 4967(6) | 1288(3) | 61(2) |
| C(17) | 2463(6) | 4303(5) | 1799(3) | 55(1) |
| C(18) | 3822(5) | 4536(4) | 2262(2) | 40(1) |

**Table S5:** Anisotropic displacement parameters ( $\text{\AA}^2 \times 10^3$ ) for *p*-**5**<sup>4</sup>Br. The anisotropic displacement factor exponent takes the form:  $-2\pi^2 [h^2 a^{*2}U^{11} + \dots + 2 h k a^* b^* U^{12}]$

|       | U <sup>11</sup> | U <sup>22</sup> | U <sup>33</sup> | U <sup>23</sup> | U <sup>13</sup> | U <sup>12</sup> |
|-------|-----------------|-----------------|-----------------|-----------------|-----------------|-----------------|
| Br(1) | 34(1)           | 26(1)           | 42(1)           | 0(1)            | 9(1)            | 3(1)            |
| Br(2) | 46(1)           | 27(1)           | 48(1)           | 3(1)            | 10(1)           | 6(1)            |
| Br(3) | 61(1)           | 54(1)           | 54(1)           | 19(1)           | 17(1)           | 18(1)           |
| Br(4) | 60(1)           | 40(1)           | 63(1)           | -3(1)           | 18(1)           | -12(1)          |
| F(1)  | 30(1)           | 53(2)           | 49(2)           | 2(1)            | -4(1)           | 8(1)            |
| F(2)  | 40(1)           | 63(2)           | 51(2)           | -14(1)          | -9(1)           | -13(1)          |
| F(3)  | 67(2)           | 34(1)           | 59(2)           | -18(1)          | 4(1)            | -11(1)          |
| F(4)  | 30(1)           | 44(1)           | 28(1)           | -5(1)           | 12(1)           | 1(1)            |
| F(5)  | 19(1)           | 52(2)           | 39(1)           | -5(1)           | 10(1)           | -1(1)           |
| F(6)  | 31(1)           | 60(2)           | 31(1)           | -16(1)          | 10(1)           | -2(1)           |
| F(7)  | 21(1)           | 51(2)           | 35(1)           | -7(1)           | 10(1)           | -2(1)           |
| F(8)  | 56(2)           | 149(4)          | 46(2)           | 7(2)            | -6(2)           | 42(2)           |
| F(9)  | 37(2)           | 190(5)          | 63(2)           | -49(3)          | -14(2)          | -5(2)           |
| F(10) | 64(2)           | 108(3)          | 88(2)           | -43(2)          | 14(2)           | -48(2)          |
| C(1)  | 24(2)           | 23(2)           | 31(2)           | -2(2)           | 10(2)           | -1(2)           |
| C(2)  | 22(2)           | 33(2)           | 35(2)           | 3(2)            | 8(2)            | 2(2)            |
| C(3)  | 27(2)           | 50(3)           | 33(2)           | -4(2)           | 2(2)            | -9(2)           |
| C(4)  | 38(2)           | 31(2)           | 40(2)           | -9(2)           | 11(2)           | -8(2)           |
| C(5)  | 33(2)           | 26(2)           | 32(2)           | -1(2)           | 12(2)           | 1(2)            |
| C(6)  | 22(2)           | 28(2)           | 24(2)           | -1(2)           | 12(2)           | -1(2)           |
| C(7)  | 22(2)           | 22(2)           | 27(2)           | -1(2)           | 4(2)            | 1(1)            |
| C(8)  | 27(2)           | 29(2)           | 24(2)           | 1(2)            | 10(2)           | 1(2)            |

|       |       |        |       |        |       |        |
|-------|-------|--------|-------|--------|-------|--------|
| C(9)  | 18(2) | 28(2)  | 36(2) | 2(2)   | 9(2)  | 2(2)   |
| C(10) | 23(2) | 28(2)  | 31(2) | 0(2)   | 6(2)  | 0(2)   |
| C(11) | 28(2) | 34(2)  | 26(2) | -4(2)  | 9(2)  | 3(2)   |
| C(12) | 19(2) | 29(2)  | 31(2) | 0(2)   | 12(2) | 0(2)   |
| C(13) | 21(2) | 44(2)  | 31(2) | -7(2)  | 6(2)  | 2(2)   |
| C(14) | 26(2) | 61(3)  | 37(2) | -2(2)  | 9(2)  | 12(2)  |
| C(15) | 36(2) | 96(4)  | 33(3) | 1(3)   | 3(2)  | 20(3)  |
| C(16) | 23(2) | 121(5) | 40(3) | -28(3) | 0(2)  | 1(3)   |
| C(17) | 29(2) | 79(4)  | 59(3) | -31(3) | 15(2) | -18(2) |
| C(18) | 32(2) | 53(3)  | 37(2) | -10(2) | 10(2) | -7(2)  |

**Table S6:** Atomic coordinates ( $\times 10^4$ ) and equivalent isotropic displacement parameters ( $\text{\AA}^2 \cdot 10^3$ ) for *p*-**5**<sup>2</sup>Br-*syn* U(eq) is defined as one third of the trace of the orthogonalized  $U^{ij}$  tensor

|        | x        | y       | z       | U(eq) |
|--------|----------|---------|---------|-------|
| F(5)   | 1663(3)  | 3306(1) | 6334(2) | 49(1) |
| F(6)   | 4073(3)  | 2384(1) | 6313(1) | 44(1) |
| F(7)   | 8261(3)  | 4043(1) | 6203(1) | 45(1) |
| F(8)   | 5843(3)  | 4967(1) | 6211(1) | 42(1) |
| C(7)   | 3658(5)  | 4165(2) | 6279(2) | 31(1) |
| C(8)   | 5376(5)  | 4326(2) | 6234(2) | 32(1) |
| C(9)   | 6623(5)  | 3852(2) | 6230(2) | 32(1) |
| C(10)  | 6244(5)  | 3186(2) | 6256(2) | 31(1) |
| C(11)  | 4540(6)  | 3017(2) | 6284(2) | 33(1) |
| C(12)  | 3286(5)  | 3498(2) | 6295(2) | 35(1) |
| C(1A)  | 1760(7)  | 5081(3) | 5895(3) | 34(1) |
| C(2A)  | 507(10)  | 5558(4) | 5996(3) | 41(2) |
| C(3A)  | -180(8)  | 5630(4) | 6556(4) | 44(2) |
| C(4A)  | 327(7)   | 5240(3) | 7016(3) | 40(1) |
| C(5A)  | 1548(8)  | 4762(3) | 6918(3) | 36(1) |
| C(6A)  | 2307(10) | 4664(3) | 6361(3) | 30(2) |
| F(1A)  | 19(5)    | 5965(2) | 5557(2) | 62(1) |
| F(2A)  | -1379(5) | 6097(2) | 6645(2) | 60(1) |
| F(3A)  | -329(5)  | 5329(2) | 7566(2) | 59(1) |
| F(4A)  | 1463(5)  | 4319(2) | 7344(2) | 26(1) |
| Br(1A) | 2681(1)  | 4996(1) | 5125(1) | 48(1) |
| C(13A) | 7588(11) | 2679(4) | 6293(3) | 32(2) |

|        |           |          |          |       |
|--------|-----------|----------|----------|-------|
| C(14A) | 8467(7)   | 2596(4)  | 6823(3)  | 37(2) |
| C(15A) | 9697(7)   | 2113(3)  | 6899(3)  | 42(1) |
| C(16A) | 10105(7)  | 1713(3)  | 6426(3)  | 42(1) |
| C(17A) | 9266(8)   | 1781(3)  | 5889(3)  | 42(1) |
| C(18A) | 8023(8)   | 2261(3)  | 5823(2)  | 38(1) |
| F(9A)  | 8386(6)   | 3020(3)  | 7295(2)  | 42(1) |
| F(10A) | 10520(5)  | 2039(2)  | 7421(2)  | 62(1) |
| F(11A) | 11308(4)  | 1247(2)  | 6485(2)  | 59(1) |
| F(12A) | 9656(5)   | 1373(2)  | 5435(2)  | 60(1) |
| Br(2A) | 6902(1)   | 2332(1)  | 5077(1)  | 50(1) |
| C(1B)  | 1390(50)  | 4781(19) | 6653(15) | 36(1) |
| C(2B)  | 150(40)   | 5348(17) | 6629(19) | 40(1) |
| C(3B)  | 70(50)    | 5660(20) | 6170(30) | 44(2) |
| C(4B)  | 940(40)   | 5573(14) | 5651(14) | 41(2) |
| C(5B)  | 2350(40)  | 5052(14) | 5628(13) | 34(1) |
| C(6B)  | 2330(60)  | 4750(20) | 6153(17) | 30(2) |
| F(1B)  | -790(30)  | 5447(9)  | 7094(8)  | 59(1) |
| F(2B)  | -1140(20) | 6182(8)  | 6084(9)  | 60(1) |
| F(3B)  | 890(20)   | 5934(9)  | 5137(10) | 67(5) |
| F(4B)  | 3280(20)  | 4995(10) | 5193(8)  | 26(1) |
| Br(1B) | 2043(6)   | 4394(2)  | 7400(2)  | 48(1) |
| C(13B) | 7770(140) | 2570(50) | 6200(30) | 32(2) |
| C(14B) | 7670(90)  | 2280(30) | 5640(30) | 38(1) |
| C(15B) | 8920(80)  | 1800(30) | 5650(30) | 42(1) |
| C(16B) | 9870(80)  | 1680(30) | 6160(30) | 42(1) |
| C(17B) | 10020(70) | 2040(30) | 6690(20) | 42(1) |
| C(18B) | 8820(90)  | 2540(40) | 6700(30) | 37(2) |
| F(9B)  | 7450(50)  | 2586(17) | 5081(15) | 42(1) |
| F(10B) | 9090(50)  | 1405(17) | 5106(18) | 60(1) |
| F(11B) | 11150(40) | 1193(16) | 6060(20) | 59(1) |
| F(12B) | 10890(50) | 1899(18) | 7071(18) | 62(1) |
| Br(2B) | 7977(16)  | 2968(7)  | 7357(6)  | 50(1) |

---



**Table S7:** Anisotropic displacement parameters ( $\text{\AA}^2 \times 10^3$ ) for *p*-5<sup>2</sup>Br-*syn*. The anisotropic displacement factor exponent takes the form:  $-2\pi^2 [h^2 a^{*2}U^{11} + \dots + 2hk a^* b^* U^{12}]$

|        | U <sup>11</sup> | U <sup>22</sup> | U <sup>33</sup> | U <sup>23</sup> | U <sup>13</sup> | U <sup>12</sup> |
|--------|-----------------|-----------------|-----------------|-----------------|-----------------|-----------------|
| F(5)   | 21(1)           | 34(1)           | 93(2)           | -1(1)           | 2(1)            | -3(1)           |
| F(6)   | 34(1)           | 22(1)           | 77(2)           | -2(1)           | 5(1)            | -2(1)           |
| F(7)   | 23(1)           | 35(1)           | 77(2)           | 4(1)            | 1(1)            | -4(1)           |
| F(8)   | 35(1)           | 25(1)           | 65(2)           | 4(1)            | -3(1)           | -5(1)           |
| C(7)   | 26(2)           | 26(2)           | 40(2)           | 1(2)            | -1(2)           | 3(2)            |
| C(8)   | 29(2)           | 21(2)           | 45(2)           | 1(2)            | -2(2)           | -2(2)           |
| C(9)   | 22(2)           | 34(2)           | 42(2)           | 1(2)            | 1(2)            | -1(2)           |
| C(10)  | 28(2)           | 30(2)           | 34(2)           | 2(2)            | 1(2)            | 2(2)            |
| C(11)  | 32(2)           | 24(2)           | 44(2)           | -1(2)           | 3(2)            | 1(2)            |
| C(12)  | 24(2)           | 33(2)           | 50(3)           | -1(2)           | 1(2)            | 0(2)            |
| C(1A)  | 27(3)           | 32(3)           | 43(3)           | 1(3)            | -12(3)          | 1(3)            |
| C(2A)  | 36(4)           | 41(3)           | 45(5)           | 6(3)            | -7(3)           | -1(3)           |
| C(3A)  | 25(3)           | 37(3)           | 70(5)           | -7(4)           | -3(3)           | 10(3)           |
| C(4A)  | 33(3)           | 33(3)           | 54(4)           | -3(3)           | 14(3)           | 2(2)            |
| C(5A)  | 27(3)           | 34(3)           | 47(4)           | -2(4)           | 3(3)            | -1(2)           |
| C(6A)  | 21(2)           | 24(3)           | 45(5)           | 6(3)            | -5(4)           | -3(2)           |
| F(1A)  | 59(2)           | 54(2)           | 72(3)           | 15(2)           | -15(2)          | 21(2)           |
| F(2A)  | 43(2)           | 44(2)           | 93(3)           | -8(2)           | 0(2)            | 18(2)           |
| F(3A)  | 60(2)           | 56(2)           | 61(2)           | -9(2)           | 20(2)           | 11(2)           |
| F(4A)  | 16(2)           | 34(2)           | 29(2)           | 1(1)            | -4(1)           | -3(1)           |
| Br(1A) | 45(1)           | 58(1)           | 40(1)           | 5(1)            | -2(1)           | -1(1)           |
| C(13A) | 25(3)           | 21(4)           | 52(3)           | -2(2)           | 9(3)            | -1(3)           |
| C(14A) | 26(4)           | 30(3)           | 56(4)           | 3(3)            | 2(3)            | -1(2)           |
| C(15A) | 28(2)           | 32(2)           | 65(3)           | 5(2)            | -2(2)           | 1(2)            |
| C(16A) | 28(2)           | 32(2)           | 65(3)           | 5(2)            | -2(2)           | 1(2)            |
| C(17A) | 40(4)           | 28(2)           | 59(4)           | -4(3)           | 15(3)           | 3(2)            |
| C(18A) | 33(3)           | 34(2)           | 47(4)           | 2(3)            | 7(3)            | 2(2)            |
| F(9A)  | 42(3)           | 42(2)           | 41(2)           | -2(2)           | 12(2)           | 5(2)            |
| F(10A) | 57(2)           | 55(2)           | 73(2)           | 5(2)            | -22(2)          | 8(2)            |
| F(11A) | 40(2)           | 37(2)           | 100(3)          | 10(2)           | 4(2)            | 18(1)           |
| F(12A) | 67(2)           | 45(2)           | 68(2)           | -12(2)          | 18(2)           | 15(2)           |
| Br(2A) | 57(1)           | 51(1)           | 43(1)           | -5(1)           | 2(1)            | 7(1)            |
| C(1B)  | 27(3)           | 34(3)           | 47(4)           | -2(4)           | 3(3)            | -1(2)           |

|        |        |        |        |        |         |       |
|--------|--------|--------|--------|--------|---------|-------|
| C(2B)  | 33(3)  | 33(3)  | 54(4)  | -3(3)  | 14(3)   | 2(2)  |
| C(3B)  | 25(3)  | 37(3)  | 70(5)  | -7(4)  | -3(3)   | 10(3) |
| C(4B)  | 36(4)  | 41(3)  | 45(5)  | 6(3)   | -7(3)   | -1(3) |
| C(5B)  | 27(3)  | 32(3)  | 43(3)  | 1(3)   | -12(3)  | 1(3)  |
| C(6B)  | 21(2)  | 24(3)  | 45(5)  | 6(3)   | -5(4)   | -3(2) |
| F(1B)  | 60(2)  | 56(2)  | 61(2)  | -9(2)  | 20(2)   | 11(2) |
| F(2B)  | 43(2)  | 44(2)  | 93(3)  | -8(2)  | 0(2)    | 18(2) |
| F(3B)  | 49(10) | 62(11) | 90(14) | 28(10) | -16(10) | 8(9)  |
| F(4B)  | 16(2)  | 34(2)  | 29(2)  | 1(1)   | -4(1)   | -3(1) |
| Br(1B) | 45(1)  | 58(1)  | 40(1)  | 5(1)   | -2(1)   | -1(1) |
| C(13B) | 25(3)  | 21(4)  | 52(3)  | -2(2)  | 9(3)    | -1(3) |
| C(14B) | 33(3)  | 34(2)  | 47(4)  | 2(3)   | 7(3)    | 2(2)  |
| C(15B) | 40(4)  | 28(2)  | 59(4)  | -4(3)  | 15(3)   | 3(2)  |
| C(16B) | 28(2)  | 32(2)  | 65(3)  | 5(2)   | -2(2)   | 1(2)  |
| C(17B) | 28(2)  | 32(2)  | 65(3)  | 5(2)   | -2(2)   | 1(2)  |
| C(18B) | 26(4)  | 30(3)  | 56(4)  | 3(3)   | 2(3)    | -1(2) |
| F(9B)  | 42(3)  | 42(2)  | 41(2)  | -2(2)  | 12(2)   | 5(2)  |
| F(10B) | 67(2)  | 45(2)  | 68(2)  | -12(2) | 18(2)   | 15(2) |
| F(11B) | 40(2)  | 37(2)  | 100(3) | 10(2)  | 4(2)    | 18(1) |
| F(12B) | 57(2)  | 55(2)  | 73(2)  | 5(2)   | -22(2)  | 8(2)  |
| Br(2B) | 57(1)  | 51(1)  | 43(1)  | -5(1)  | 2(1)    | 7(1)  |

**Table S8:** Atomic coordinates ( $\times 10^4$ ) and equivalent isotropic displacement parameters ( $\text{\AA}^2 \times 10^3$ ) for *p*-5<sup>2</sup>Br-*anti* U(eq) is defined as one third of the trace of the orthogonalized  $U^{ij}$  tensor

|       | x        | y       | z       | U(eq) |
|-------|----------|---------|---------|-------|
| Br(1) | 1501(1)  | 5384(1) | 1742(1) | 36(1) |
| F(1)  | 3356(4)  | 2875(3) | 190(2)  | 46(1) |
| F(2)  | 7498(4)  | 296(3)  | 500(2)  | 47(1) |
| F(3)  | 10763(4) | -325(3) | 2435(2) | 49(1) |
| F(4)  | 9854(4)  | 1625(3) | 4083(2) | 39(1) |
| F(5)  | 4863(4)  | 1393(2) | 5566(2) | 35(1) |
| F(6)  | 3901(4)  | 2961(2) | 7399(2) | 34(1) |
| C(1)  | 4406(6)  | 3582(4) | 2007(3) | 27(1) |
| C(2)  | 4912(6)  | 2594(5) | 1170(3) | 32(1) |
| C(3)  | 7032(6)  | 1246(4) | 1317(3) | 33(1) |

|      |         |         |         |       |
|------|---------|---------|---------|-------|
| C(4) | 8682(6) | 938(4)  | 2302(3) | 33(1) |
| C(5) | 8176(6) | 1922(4) | 3141(3) | 29(1) |
| C(6) | 6030(6) | 3242(4) | 3036(3) | 25(1) |
| C(7) | 5499(6) | 4161(4) | 4029(3) | 26(1) |
| C(8) | 4955(6) | 3187(4) | 5272(3) | 28(1) |
| C(9) | 4449(6) | 3992(4) | 6216(3) | 27(1) |

**Table S9:** Anisotropic displacement parameters ( $\text{\AA}^2 \times 10^3$ ) for *p*-5<sup>2</sup>Br-*anti*. The anisotropic displacement factor exponent takes the form:  $-2\pi^2 [h^2 a^{*2}U^{11} + \dots + 2 h k a^* b^* U^{12}]$

|       | U <sup>11</sup> | U <sup>22</sup> | U <sup>33</sup> | U <sup>23</sup> | U <sup>13</sup> | U <sup>12</sup> |
|-------|-----------------|-----------------|-----------------|-----------------|-----------------|-----------------|
| Br(1) | 33(1)           | 38(1)           | 36(1)           | -14(1)          | -1(1)           | 0(1)            |
| F(1)  | 52(1)           | 60(1)           | 33(1)           | -27(1)          | -8(1)           | -9(1)           |
| F(2)  | 62(1)           | 48(1)           | 42(1)           | -33(1)          | 13(1)           | -10(1)          |
| F(3)  | 50(1)           | 42(1)           | 54(1)           | -24(1)          | 2(1)            | 12(1)           |
| F(4)  | 44(1)           | 37(1)           | 31(1)           | -9(1)           | -9(1)           | 5(1)            |
| F(5)  | 58(1)           | 22(1)           | 28(1)           | -10(1)          | 6(1)            | -11(1)          |
| F(6)  | 52(1)           | 28(1)           | 20(1)           | -7(1)           | 8(1)            | -9(1)           |
| C(1)  | 31(2)           | 27(2)           | 24(1)           | -9(1)           | 3(1)            | -6(1)           |
| C(2)  | 36(2)           | 39(2)           | 25(2)           | -16(1)          | 1(1)            | -10(1)          |
| C(3)  | 46(2)           | 33(2)           | 28(2)           | -18(1)          | 10(1)           | -12(2)          |
| C(4)  | 36(2)           | 26(2)           | 35(2)           | -13(1)          | 8(1)            | 0(1)            |
| C(5)  | 36(2)           | 28(2)           | 23(1)           | -9(1)           | 1(1)            | -5(1)           |
| C(6)  | 33(2)           | 21(1)           | 22(1)           | -9(1)           | 6(1)            | -7(1)           |
| C(7)  | 31(2)           | 27(2)           | 22(1)           | -11(1)          | 1(1)            | -2(1)           |
| C(8)  | 37(2)           | 24(1)           | 27(2)           | -11(1)          | 1(1)            | -4(1)           |
| C(9)  | 35(2)           | 24(1)           | 20(1)           | -5(1)           | 2(1)            | -4(1)           |

**Table S10:** Atomic coordinates ( $\times 10^4$ ) and equivalent isotropic displacement parameters ( $\text{\AA}^2 \times 10^3$ ) for *m*-5<sup>4</sup>Br TDAI U(eq) is defined as one third of the trace of the orthogonalized  $U^{ij}$  tensor

|        | x        | y         | z       | U(eq)  |
|--------|----------|-----------|---------|--------|
| I(2)   | 1427(1)  | 2500      | 5000    | 50(1)  |
| N(1)   | 2738(4)  | 7500      | 5000    | 73(2)  |
| N(2)   | 1173(2)  | 6735(6)   | 4596(1) | 53(1)  |
| C(19)  | 3104(4)  | 6875(11)  | 4729(2) | 99(3)  |
| C(20)  | 2080(4)  | 7500      | 5000    | 58(2)  |
| C(21)  | 1496(3)  | 7193(7)   | 4853(2) | 49(1)  |
| C(22)  | 466(3)   | 6423(10)  | 4613(2) | 65(2)  |
| C(23)  | 1511(4)  | 6065(9)   | 4328(2) | 69(2)  |
| F(4)   | 2675(2)  | 97(4)     | 3832(1) | 54(1)  |
| F(5)   | 3270(2)  | 5964(4)   | 3916(1) | 68(1)  |
| F(6)   | 2136(2)  | 6907(4)   | 3640(1) | 70(1)  |
| F(7)   | 1265(2)  | 4473(4)   | 3465(1) | 63(1)  |
| C(7)   | 3000(3)  | 2997(7)   | 3877(1) | 46(1)  |
| C(8)   | 2851(3)  | 4730(7)   | 3829(2) | 54(2)  |
| C(9)   | 2271(3)  | 5212(7)   | 3687(2) | 55(2)  |
| C(10)  | 1827(3)  | 3964(7)   | 3597(1) | 48(1)  |
| C(11)  | 1948(3)  | 2209(6)   | 3646(1) | 43(1)  |
| C(12)  | 2539(3)  | 1802(7)   | 3784(1) | 45(1)  |
| Br(1A) | 4069(2)  | 2897(3)   | 3364(1) | 74(1)  |
| Br(2A) | 2881(3)  | 1927(10)  | 4562(2) | 51(1)  |
| Br(3A) | 2080(3)  | 1177(10)  | 2964(2) | 56(1)  |
| Br(4A) | 1072(4)  | 890(10)   | 4166(2) | 41(1)  |
| F(1A)  | 5308(5)  | 2010(20)  | 3731(3) | 114(4) |
| F(2A)  | 5422(6)  | 1030(30)  | 4332(3) | 105(4) |
| F(3A)  | 4372(9)  | 1010(30)  | 4705(3) | 85(3)  |
| F(8A)  | 147(2)   | -1710(5)  | 3883(1) | 76(1)  |
| F(9A)  | 100(20)  | -2800(40) | 3256(8) | 73(6)  |
| F(10A) | 827(16)  | -1320(40) | 2853(3) | 77(7)  |
| C(1A)  | 4169(10) | 2480(30)  | 3795(3) | 56(4)  |
| C(2A)  | 4761(5)  | 1950(18)  | 3910(3) | 64(2)  |
| C(3A)  | 4841(6)  | 1550(20)  | 4226(4) | 60(3)  |
| C(4A)  | 4303(7)  | 1510(20)  | 4414(3) | 64(2)  |
| C(5A)  | 3719(10) | 1940(30)  | 4299(6) | 45(3)  |

|        |          |           |          |        |
|--------|----------|-----------|----------|--------|
| C(6A)  | 3636(3)  | 2471(8)   | 4017(2)  | 59(2)  |
| C(13A) | 1462(3)  | 874(6)    | 3551(1)  | 45(1)  |
| C(14A) | 1037(3)  | 172(7)    | 3769(1)  | 47(1)  |
| C(15A) | 579(3)   | -1032(8)  | 3676(2)  | 58(1)  |
| C(16A) | 529(3)   | -1527(8)  | 3370(2)  | 62(2)  |
| C(17A) | 956(3)   | -849(7)   | 3152(2)  | 58(1)  |
| C(18A) | 1455(7)  | 270(20)   | 3238(7)  | 47(1)  |
| Br(1B) | 4299(4)  | 3118(7)   | 3488(2)  | 104(2) |
| Br(2B) | 2962(6)  | 1836(19)  | 4610(3)  | 64(2)  |
| Br(3B) | 1970(8)  | 1125(14)  | 2917(3)  | 73(2)  |
| Br(4B) | 1135(5)  | 706(14)   | 4231(3)  | 39(1)  |
| F(1B)  | 5401(8)  | 1980(40)  | 3908(5)  | 114(4) |
| F(2B)  | 5382(11) | 1040(50)  | 4494(5)  | 105(4) |
| F(3B)  | 4225(17) | 800(60)   | 4802(6)  | 85(3)  |
| F(8B)  | 147(2)   | -1710(5)  | 3883(1)  | 76(1)  |
| F(9B)  | 60(30)   | -2530(60) | 3323(12) | 78(9)  |
| F(10B) | 980(20)  | -1500(50) | 2861(4)  | 72(8)  |
| C(1B)  | 4269(18) | 2410(60)  | 3915(6)  | 56(4)  |
| C(2B)  | 4836(10) | 1940(40)  | 4072(7)  | 64(2)  |
| C(3B)  | 4788(11) | 1370(40)  | 4371(5)  | 60(3)  |
| C(4B)  | 4185(12) | 1340(40)  | 4508(6)  | 64(2)  |
| C(5B)  | 3574(19) | 1910(60)  | 4371(11) | 45(3)  |
| C(6B)  | 3636(3)  | 2471(8)   | 4017(2)  | 59(2)  |
| C(13B) | 1462(3)  | 874(6)    | 3551(1)  | 45(1)  |
| C(14B) | 1037(3)  | 172(7)    | 3769(1)  | 47(1)  |
| C(15B) | 579(3)   | -1032(8)  | 3676(2)  | 58(1)  |
| C(16B) | 529(3)   | -1527(8)  | 3370(2)  | 62(2)  |
| C(17B) | 956(3)   | -849(7)   | 3152(2)  | 58(1)  |
| C(18B) | 1381(10) | 420(30)   | 3244(9)  | 47(1)  |
| N(3A)  | 2350(7)  | 6791(14)  | 2500     | 74(4)  |
| N(5A)  | 3803(4)  | 8356(11)  | 2921(2)  | 61(2)  |
| C(24A) | 3496(3)  | 7978(8)   | 2660(1)  | 56(2)  |
| C(25A) | 2951(7)  | 7489(16)  | 2500     | 56(3)  |
| C(26A) | 2090(6)  | 6083(15)  | 2795(3)  | 87(4)  |
| C(27A) | 3479(16) | 8000(40)  | 3197(5)  | 72(4)  |
| C(28A) | 4490(6)  | 8920(20)  | 2915(3)  | 85(4)  |
| I(1A)  | 3453(3)  | 2862(5)   | 2500     | 62(1)  |
| N(3B)  | 4636(8)  | 9190(30)  | 2500     | 49(5)  |
| N(5B)  | 3200(8)  | 7470(20)  | 2929(4)  | 66(5)  |

|        |          |          |          |       |
|--------|----------|----------|----------|-------|
| C(24B) | 3496(3)  | 7978(8)  | 2660(1)  | 56(2) |
| C(25B) | 4043(16) | 8420(30) | 2500     | 63(8) |
| C(26B) | 4890(10) | 9890(30) | 2789(4)  | 61(5) |
| C(27B) | 3570(30) | 7770(90) | 3267(12) | 72(4) |
| C(28B) | 2573(12) | 6560(30) | 2935(6)  | 82(7) |
| I(1B)  | 3633(4)  | 3072(10) | 2500     | 62(1) |

**Table S11:** Anisotropic displacement parameters ( $\text{\AA}^2 \times 10^3$ ) for *m*-5<sup>4</sup>Br TDAI. The anisotropic displacement factor exponent takes the form:  $-2\pi^2 [h^2 a^{*2}U^{11} + \dots + 2 h k a^* b^* U^{12}]$

|        | U <sup>11</sup> | U <sup>22</sup> | U <sup>33</sup> | U <sup>23</sup> | U <sup>13</sup> | U <sup>12</sup> |
|--------|-----------------|-----------------|-----------------|-----------------|-----------------|-----------------|
| I(2)   | 52(1)           | 45(1)           | 51(1)           | 4(1)            | 0               | 0               |
| N(1)   | 36(4)           | 66(5)           | 116(7)          | -24(5)          | 0               | 0               |
| N(2)   | 50(3)           | 52(3)           | 58(3)           | -2(2)           | 2(2)            | 6(2)            |
| C(19)  | 48(4)           | 73(5)           | 176(9)          | -30(6)          | 24(5)           | 10(4)           |
| C(20)  | 49(5)           | 40(4)           | 84(6)           | -9(4)           | 0               | 0               |
| C(21)  | 42(3)           | 31(3)           | 74(4)           | -2(2)           | -1(3)           | 2(2)            |
| C(22)  | 56(4)           | 76(4)           | 62(4)           | 7(3)            | -18(3)          | -3(3)           |
| C(23)  | 92(5)           | 55(4)           | 61(4)           | -5(3)           | 12(4)           | 10(4)           |
| F(4)   | 61(2)           | 28(1)           | 72(2)           | -2(1)           | 9(2)            | 1(1)            |
| F(5)   | 59(2)           | 39(2)           | 104(3)          | -10(2)          | 17(2)           | -17(2)          |
| F(6)   | 76(2)           | 25(2)           | 109(3)          | 1(2)            | 16(2)           | -2(2)           |
| F(7)   | 67(2)           | 39(2)           | 82(2)           | 5(2)            | 3(2)            | 1(2)            |
| C(7)   | 45(3)           | 36(3)           | 57(3)           | -5(2)           | 23(2)           | -4(2)           |
| C(8)   | 56(3)           | 36(3)           | 69(4)           | -8(3)           | 24(3)           | -11(3)          |
| C(9)   | 64(4)           | 25(3)           | 78(4)           | -2(3)           | 22(3)           | -5(2)           |
| C(10)  | 52(3)           | 37(3)           | 55(3)           | 1(2)            | 13(3)           | 1(2)            |
| C(11)  | 55(3)           | 31(3)           | 42(3)           | -3(2)           | 20(2)           | -5(2)           |
| C(12)  | 51(3)           | 31(3)           | 54(3)           | -3(2)           | 19(3)           | -2(2)           |
| Br(1A) | 67(1)           | 79(1)           | 77(1)           | 11(1)           | 35(1)           | 7(1)            |
| Br(2A) | 48(1)           | 61(1)           | 45(2)           | -2(1)           | -7(2)           | 2(1)            |
| Br(3A) | 66(2)           | 58(1)           | 44(2)           | -7(1)           | 6(1)            | -5(1)           |
| Br(4A) | 46(1)           | 48(1)           | 30(2)           | 17(1)           | 2(1)            | 2(1)            |
| F(1A)  | 52(4)           | 163(6)          | 126(10)         | 50(10)          | 42(6)           | 30(4)           |
| F(2A)  | 53(3)           | 119(4)          | 143(12)         | -6(12)          | -14(8)          | 25(3)           |
| F(3A)  | 72(9)           | 93(7)           | 90(10)          | 7(8)            | -15(7)          | 9(6)            |

|        |         |        |         |        |         |        |
|--------|---------|--------|---------|--------|---------|--------|
| F(8A)  | 69(2)   | 76(2)  | 82(2)   | 16(2)  | 6(2)    | -33(2) |
| F(9A)  | 91(14)  | 48(9)  | 81(13)  | -20(8) | -17(10) | -30(9) |
| F(10A) | 108(18) | 68(7)  | 55(6)   | -14(5) | -7(6)   | 26(8)  |
| C(1A)  | 43(7)   | 64(4)  | 60(11)  | 13(10) | 11(8)   | 5(5)   |
| C(2A)  | 44(4)   | 75(4)  | 74(7)   | 0(5)   | 13(4)   | 8(3)   |
| C(3A)  | 43(5)   | 64(6)  | 74(12)  | 26(9)  | 13(7)   | 5(4)   |
| C(4A)  | 44(4)   | 75(4)  | 74(7)   | 0(5)   | 13(4)   | 8(3)   |
| C(5A)  | 23(10)  | 43(3)  | 70(14)  | -13(7) | 21(6)   | 0(7)   |
| C(6A)  | 43(3)   | 44(3)  | 89(5)   | -9(3)  | 19(3)   | -3(2)  |
| C(13A) | 55(3)   | 27(2)  | 52(3)   | 2(2)   | 4(2)    | 2(2)   |
| C(14A) | 57(3)   | 33(2)  | 52(2)   | 1(2)   | 2(2)    | 4(2)   |
| C(15A) | 68(3)   | 45(2)  | 62(3)   | 2(2)   | -2(2)   | -4(2)  |
| C(16A) | 68(4)   | 35(3)  | 84(5)   | -5(3)  | -14(4)  | -14(3) |
| C(17A) | 68(3)   | 45(2)  | 62(3)   | 2(2)   | -2(2)   | -4(2)  |
| C(18A) | 57(3)   | 33(2)  | 52(2)   | 1(2)   | 2(2)    | 4(2)   |
| Br(1B) | 82(3)   | 130(3) | 101(3)  | -5(2)  | 55(3)   | -2(2)  |
| Br(2B) | 71(4)   | 72(2)  | 49(3)   | -3(2)  | -16(2)  | 14(2)  |
| Br(3B) | 134(6)  | 51(2)  | 33(2)   | 3(1)   | 13(3)   | 1(3)   |
| Br(4B) | 45(2)   | 44(2)  | 29(3)   | 17(2)  | -2(2)   | -2(1)  |
| F(1B)  | 52(4)   | 163(6) | 126(10) | 50(10) | 42(6)   | 30(4)  |
| F(2B)  | 53(3)   | 119(4) | 143(12) | -6(12) | -14(8)  | 25(3)  |
| F(3B)  | 72(9)   | 93(7)  | 90(10)  | 7(8)   | -15(7)  | 9(6)   |
| F(8B)  | 69(2)   | 76(2)  | 82(2)   | 16(2)  | 6(2)    | -33(2) |
| F(9B)  | 84(11)  | 62(15) | 88(19)  | -36(9) | -4(13)  | -9(11) |
| F(10B) | 74(13)  | 65(14) | 78(11)  | -34(8) | -21(7)  | -9(13) |
| C(1B)  | 43(7)   | 64(4)  | 60(11)  | 13(10) | 11(8)   | 5(5)   |
| C(2B)  | 44(4)   | 75(4)  | 74(7)   | 0(5)   | 13(4)   | 8(3)   |
| C(3B)  | 43(5)   | 64(6)  | 74(12)  | 26(9)  | 13(7)   | 5(4)   |
| C(4B)  | 44(4)   | 75(4)  | 74(7)   | 0(5)   | 13(4)   | 8(3)   |
| C(5B)  | 23(10)  | 43(3)  | 70(14)  | -13(7) | 21(6)   | 0(7)   |
| C(6B)  | 43(3)   | 44(3)  | 89(5)   | -9(3)  | 19(3)   | -3(2)  |
| C(13B) | 55(3)   | 27(2)  | 52(3)   | 2(2)   | 4(2)    | 2(2)   |
| C(14B) | 57(3)   | 33(2)  | 52(2)   | 1(2)   | 2(2)    | 4(2)   |
| C(15B) | 68(3)   | 45(2)  | 62(3)   | 2(2)   | -2(2)   | -4(2)  |
| C(16B) | 68(4)   | 35(3)  | 84(5)   | -5(3)  | -14(4)  | -14(3) |
| C(17B) | 68(3)   | 45(2)  | 62(3)   | 2(2)   | -2(2)   | -4(2)  |
| C(18B) | 57(3)   | 33(2)  | 52(2)   | 1(2)   | 2(2)    | 4(2)   |
| N(3A)  | 80(9)   | 27(5)  | 114(11) | 0      | 0       | 1(6)   |
| N(5A)  | 76(6)   | 61(5)  | 47(4)   | 8(4)   | -5(4)   | 4(4)   |

|        |         |         |         |        |        |        |
|--------|---------|---------|---------|--------|--------|--------|
| C(24A) | 59(4)   | 53(3)   | 56(3)   | 5(3)   | 4(3)   | 1(3)   |
| C(25A) | 72(9)   | 37(6)   | 58(8)   | 0      | 0      | 1(6)   |
| C(26A) | 69(8)   | 53(6)   | 137(12) | 2(7)   | 29(8)  | -9(6)  |
| C(27A) | 92(12)  | 92(11)  | 32(12)  | 18(8)  | -13(8) | -2(8)  |
| C(28A) | 72(8)   | 113(10) | 68(7)   | 1(7)   | -15(6) | 27(8)  |
| I(1A)  | 53(2)   | 54(1)   | 79(1)   | 0      | 0      | 12(1)  |
| N(3B)  | 21(8)   | 75(13)  | 50(10)  | 0      | 0      | -13(8) |
| N(5B)  | 74(11)  | 52(9)   | 71(11)  | -7(7)  | 16(9)  | -17(8) |
| C(24B) | 59(4)   | 53(3)   | 56(3)   | 5(3)   | 4(3)   | 1(3)   |
| C(25B) | 100(20) | 44(13)  | 47(13)  | 0      | 0      | 29(14) |
| C(26B) | 59(11)  | 65(11)  | 61(11)  | 2(9)   | 2(9)   | 14(9)  |
| C(27B) | 92(12)  | 92(11)  | 32(12)  | 18(8)  | -13(8) | -2(8)  |
| C(28B) | 74(15)  | 82(15)  | 89(16)  | -1(12) | 41(13) | 1(12)  |
| I(1B)  | 53(2)   | 54(1)   | 79(1)   | 0      | 0      | 12(1)  |

**Table S12:** Hydrogen coordinates ( $\times 10^4$ ) and isotropic displacement parameters ( $\text{\AA}^2 \times 10^3$ ) for *m*-5<sup>4</sup>Br TDAI.

|        | x    | y     | z    | U(eq) |
|--------|------|-------|------|-------|
| H(19A) | 3286 | 7871  | 4615 | 149   |
| H(19B) | 2809 | 6219  | 4592 | 149   |
| H(19C) | 3462 | 6117  | 4798 | 149   |
| H(22A) | 265  | 6688  | 4412 | 97    |
| H(22B) | 274  | 7173  | 4774 | 97    |
| H(22C) | 385  | 5201  | 4666 | 97    |
| H(23A) | 1225 | 6149  | 4145 | 104   |
| H(23B) | 1627 | 4843  | 4364 | 104   |
| H(23C) | 1910 | 6745  | 4293 | 104   |
| H(26A) | 1645 | 5642  | 2761 | 130   |
| H(26B) | 2081 | 7005  | 2952 | 130   |
| H(26C) | 2372 | 5131  | 2866 | 130   |
| H(27A) | 3754 | 8344  | 3373 | 87    |
| H(27B) | 3387 | 6746  | 3209 | 87    |
| H(27C) | 3065 | 8646  | 3203 | 87    |
| H(28A) | 4653 | 9032  | 3128 | 127   |
| H(28B) | 4522 | 10048 | 2809 | 127   |



|        |      |       |      |     |
|--------|------|-------|------|-----|
| H(28C) | 4754 | 8057  | 2803 | 127 |
| H(26D) | 5369 | 9985  | 2776 | 92  |
| H(26E) | 4772 | 9116  | 2962 | 92  |
| H(26F) | 4702 | 11048 | 2826 | 92  |
| H(27D) | 3246 | 8121  | 3424 | 108 |
| H(27E) | 3902 | 8688  | 3245 | 108 |
| H(27F) | 3782 | 6687  | 3332 | 108 |
| H(28D) | 2643 | 5340  | 2996 | 122 |
| H(28E) | 2374 | 6593  | 2727 | 122 |
| H(28F) | 2280 | 7119  | 3085 | 122 |

**Table S13:** Atomic coordinates ( $\times 10^4$ ) and equivalent isotropic displacement parameters ( $\text{\AA}^2 \times 10^3$ ) for *p*-5<sup>4</sup>Br TDAI U(eq) is defined as one third of the trace of the orthogonalized  $U^{ij}$  tensor

|          | x        | y        | z        | U(eq)  |
|----------|----------|----------|----------|--------|
| I(1A^a)  | 5000     | 1657(1)  | 2500     | 50(1)  |
| I(1B^b)  | 4690(30) | 1681(15) | 3000(60) | 50(1)  |
| N(1)     | 5000     | 690(3)   | 7500     | 48(1)  |
| N(2)     | 4174(2)  | 2235(2)  | 6578(5)  | 40(1)  |
| C(10)    | 4459(2)  | 335(2)   | 6709(7)  | 50(1)  |
| C(11)    | 5000     | 1335(3)  | 7500     | 40(1)  |
| C(12)    | 4700(2)  | 1919(2)  | 7131(5)  | 34(1)  |
| C(13)    | 4203(2)  | 2935(2)  | 6148(6)  | 47(1)  |
| C(14)    | 3651(2)  | 1854(2)  | 5747(7)  | 48(1)  |
| Br(1A^a) | 4161(1)  | 6701(2)  | 6054(4)  | 57(1)  |
| Br(2A^a) | 1661(1)  | 5869(1)  | 4138(2)  | 55(1)  |
| F(1A^a)  | 2310(4)  | 4543(3)  | 4341(10) | 93(2)  |
| F(2A^a)  | 3521(5)  | 4258(3)  | 5179(11) | 116(3) |
| F(3A^a)  | 4361(3)  | 5223(5)  | 5974(11) | 99(3)  |
| C(1A^a)  | 3579(4)  | 6034(6)  | 5480(15) | 38(2)  |
| C(2A^a)  | 3760(6)  | 5406(10) | 5523(19) | 76(4)  |
| C(3A^a)  | 3335(7)  | 4889(5)  | 5121(14) | 66(3)  |
| C(4A^a)  | 2713(6)  | 5037(5)  | 4707(13) | 59(2)  |
| C(5A^a)  | 2507(4)  | 5685(4)  | 4679(12) | 40(2)  |
| C(6A^a)  | 2939(3)  | 6195(6)  | 5059(14) | 29(2)  |
| Br(1B^b) | 4237(2)  | 6904(2)  | 6097(8)  | 37(1)  |
| Br(2B^b) | 1893(3)  | 5625(3)  | 4244(5)  | 89(1)  |

|         |          |          |          |        |
|---------|----------|----------|----------|--------|
| F(1B^b) | 2729(9)  | 4446(7)  | 4510(20) | 93(2)  |
| F(2B^b) | 3998(10) | 4395(7)  | 5280(30) | 116(3) |
| F(3B^b) | 4667(7)  | 5489(10) | 5970(30) | 99(3)  |
| C(1B^b) | 3759(11) | 6173(15) | 5610(40) | 38(2)  |
| C(2B^b) | 4022(14) | 5450(20) | 5640(50) | 76(4)  |
| C(3B^b) | 3699(12) | 4974(13) | 5300(30) | 66(3)  |
| C(4B^b) | 3054(16) | 4994(13) | 4900(30) | 59(2)  |
| C(5B^b) | 2760(8)  | 5584(11) | 4810(30) | 40(2)  |
| C(6B^b) | 3131(10) | 6144(15) | 5210(40) | 29(2)  |
| F(4)    | 2848(1)  | 6934(1)  | 8160(3)  | 41(1)  |
| F(5)    | 2381(1)  | 8160(1)  | 8066(3)  | 41(1)  |
| C(7)    | 2745(2)  | 6859(2)  | 5043(5)  | 32(1)  |
| C(8)    | 2680(2)  | 7205(2)  | 6594(5)  | 32(1)  |
| C(9)    | 2442(2)  | 7840(2)  | 6544(5)  | 34(1)  |

---

**Table S14:** Anisotropic displacement parameters ( $\text{\AA}^2 \times 10^3$ ) for *p*-5<sup>4</sup>Br TDAI. The anisotropic displacement factor exponent takes the form:  $-2\pi^2 [h^2 a^{*2}U^{11} + \dots + 2 h k a^* b^* U^{12}]$

|                      | U <sup>11</sup> | U <sup>22</sup> | U <sup>33</sup> | U <sup>23</sup> | U <sup>13</sup> | U <sup>12</sup> |
|----------------------|-----------------|-----------------|-----------------|-----------------|-----------------|-----------------|
| I(1A <sup>a</sup> )  | 56(1)           | 50(1)           | 44(1)           | 0               | 16(1)           | 0               |
| I(1B <sup>b</sup> )  | 56(1)           | 50(1)           | 44(1)           | 0               | 16(1)           | 0               |
| N(1)                 | 37(2)           | 37(3)           | 66(4)           | 0               | -18(2)          | 0               |
| N(2)                 | 35(2)           | 42(2)           | 43(2)           | -1(2)           | -9(1)           | 8(2)            |
| C(10)                | 41(2)           | 43(2)           | 65(3)           | -5(2)           | -11(2)          | -2(2)           |
| C(11)                | 38(3)           | 42(3)           | 39(3)           | 0               | -8(2)           | 0               |
| C(12)                | 34(2)           | 37(2)           | 31(2)           | 0(2)            | -4(2)           | 1(2)            |
| C(13)                | 49(2)           | 44(2)           | 48(3)           | 8(2)            | -2(2)           | 11(2)           |
| C(14)                | 27(2)           | 59(3)           | 56(3)           | -6(2)           | -7(2)           | 9(2)            |
| Br(1A <sup>a</sup> ) | 29(1)           | 95(2)           | 46(1)           | -3(1)           | -6(1)           | -6(1)           |
| Br(2A <sup>a</sup> ) | 46(1)           | 60(1)           | 58(1)           | -1(1)           | -5(1)           | -24(1)          |
| F(1A <sup>a</sup> )  | 141(6)          | 38(2)           | 97(3)           | -3(2)           | -12(5)          | -21(4)          |
| F(2A <sup>a</sup> )  | 186(8)          | 45(3)           | 115(4)          | -4(3)           | -16(7)          | 56(5)           |
| F(3A <sup>a</sup> )  | 78(5)           | 123(8)          | 94(3)           | -10(4)          | -16(5)          | 67(5)           |
| C(1A <sup>a</sup> )  | 36(7)           | 44(6)           | 30(3)           | -5(4)           | -13(4)          | 3(4)            |
| C(2A <sup>a</sup> )  | 86(10)          | 90(6)           | 50(4)           | 1(4)            | -5(7)           | 69(11)          |
| C(3A <sup>a</sup> )  | 97(9)           | 39(4)           | 59(5)           | -2(3)           | -12(7)          | 30(7)           |
| C(4A <sup>a</sup> )  | 91(7)           | 34(3)           | 50(4)           | 0(3)            | -17(5)          | 6(5)            |
| C(5A <sup>a</sup> )  | 49(6)           | 32(4)           | 38(3)           | 0(3)            | -5(4)           | 3(4)            |
| C(6A <sup>a</sup> )  | 24(5)           | 35(3)           | 25(3)           | 2(2)            | -9(4)           | 5(5)            |
| Br(1B <sup>b</sup> ) | 23(1)           | 48(1)           | 37(1)           | -3(1)           | -4(1)           | -2(1)           |
| Br(2B <sup>b</sup> ) | 78(2)           | 101(3)          | 88(2)           | -18(2)          | 0(2)            | -58(2)          |
| F(1B <sup>b</sup> )  | 141(6)          | 38(2)           | 97(3)           | -3(2)           | -12(5)          | -21(4)          |
| F(2B <sup>b</sup> )  | 186(8)          | 45(3)           | 115(4)          | -4(3)           | -16(7)          | 56(5)           |
| F(3B <sup>b</sup> )  | 78(5)           | 123(8)          | 94(3)           | -10(4)          | -16(5)          | 67(5)           |
| C(1B <sup>b</sup> )  | 36(7)           | 44(6)           | 30(3)           | -5(4)           | -13(4)          | 3(4)            |
| C(2B <sup>b</sup> )  | 86(10)          | 90(6)           | 50(4)           | 1(4)            | -5(7)           | 69(11)          |
| C(3B <sup>b</sup> )  | 97(9)           | 39(4)           | 59(5)           | -2(3)           | -12(7)          | 30(7)           |
| C(4B <sup>b</sup> )  | 91(7)           | 34(3)           | 50(4)           | 0(3)            | -17(5)          | 6(5)            |
| C(5B <sup>b</sup> )  | 49(6)           | 32(4)           | 38(3)           | 0(3)            | -5(4)           | 3(4)            |
| C(6B <sup>b</sup> )  | 24(5)           | 35(3)           | 25(3)           | 2(2)            | -9(4)           | 5(5)            |
| F(4)                 | 47(1)           | 48(1)           | 27(1)           | 4(1)            | -4(1)           | -1(1)           |
| F(5)                 | 46(1)           | 48(1)           | 27(1)           | -9(1)           | -2(1)           | -2(1)           |

|      |       |       |       |       |       |        |
|------|-------|-------|-------|-------|-------|--------|
| C(7) | 28(2) | 39(2) | 30(2) | -1(2) | -4(1) | -9(2)  |
| C(8) | 27(2) | 42(2) | 26(2) | 1(2)  | -3(1) | -7(2)  |
| C(9) | 29(2) | 46(2) | 26(2) | -7(2) | -2(1) | -10(2) |

---

**Table S15:** Hydrogen coordinates (  $\times 10^4$  ) and isotropic displacement parameters ( $\text{\AA}^2 \times 10^3$ ) for *p*-5<sup>4Br</sup> TDAI.

|        | x    | y    | z    | U(eq) |
|--------|------|------|------|-------|
| H(10A) | 4351 | 501  | 5510 | 76    |
| H(10B) | 4102 | 397  | 7433 | 76    |
| H(10C) | 4559 | -134 | 6652 | 76    |
| H(13A) | 4357 | 2989 | 4968 | 71    |
| H(13B) | 4489 | 3157 | 7027 | 71    |
| H(13C) | 3784 | 3128 | 6160 | 71    |
| H(14A) | 3751 | 1717 | 4559 | 72    |
| H(14B) | 3271 | 2125 | 5657 | 72    |
| H(14C) | 3581 | 1466 | 6468 | 72    |

### B.3.) Additional non-covalent interactions found in the crystal data

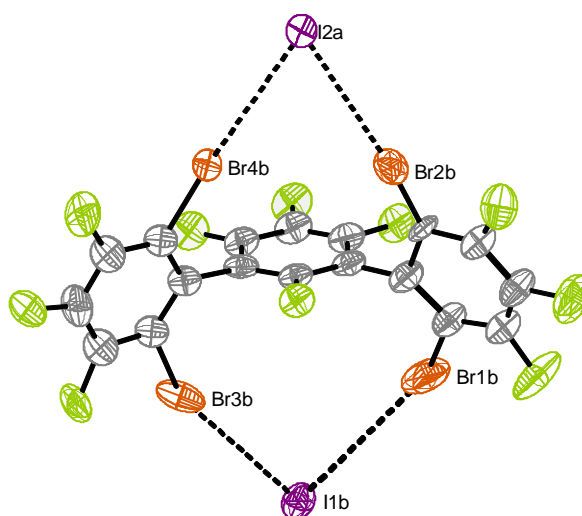

**Figure S1:** Less probable interaction which can be found due to a disorder of one of the iodides (I1b instead of I1a) in the crystal of *m*-5<sup>4Br</sup> TDAI.

### B.4.) Summary of halogen bonding contacts

**Table S16:** Halogen bonding angles and distances including their standard deviations (below 100% van der Waals radius and above C-Br--X angles of 150°).

| Compound                              | Interaction       | d <sub>Br-X</sub> [Å] | ∠ <sub>CBrX</sub> [°] | % V.D.W. radius |
|---------------------------------------|-------------------|-----------------------|-----------------------|-----------------|
| 2183888                               | C1-Br1...Br2      | 3.4101(7)             | 153.773(127)          | 92.2            |
| ( <i>m</i> -5 <sup>4Br</sup> )        | C5-Br2...Br1      | 3.6095(7)             | 165.545(128)          | 97.6            |
| 2183889                               | C5A-Br2A...I2     | 3.5388(67)            | 172.508(669)          | 91.7            |
| ( <i>m</i> -5 <sup>4Br</sup><br>TDAI) | C5B-Br2B...I2     | 3.5859(124)           | 164.821(1581)         | 92.9            |
|                                       | C14AB-Br4A...I2   | 3.8571(85)            | 171.381(434)          | 99.9            |
|                                       | C14AB-Br4B...I2   | 3.6271(125)           | 168.466(572)          | 94.0            |
|                                       | C1A-Br1A...I1B    | 3.8161(39)            | 169.451(424)          | 98.9            |
|                                       | C18A-Br3A...I1A   | 3.6723(84)            | 173.136(604)          | 95.1            |
|                                       | C18A-Br3A...I1A   | 3.7590(158)           | 161.619(951)          | 97.4            |
| 2183890                               | C1-Br1...Br3      | 3.4929(7)             | 155.782(119)          | 94.4            |
| ( <i>p</i> -5 <sup>4Br</sup> )        |                   |                       |                       |                 |
| 2183893                               | C1A-Br1A...I1B1   | 3.7531(363)           | 154.805(645)          | 97.2            |
| ( <i>p</i> -5 <sup>4Br</sup><br>TDAI) | C1B-Br1B...I1A    | 3.4844(39)            | 171.702(904)          | 90.3            |
|                                       | C1B-Br1B...I1B2   | 3.7174(460)           | 175.773(1042)         | 96.3            |
|                                       | C5A-Br2A...I1B1/2 | 3.6069(542)           | 157.391(880)          | 93.4            |

## C.) NMR-Spectra

### C.1.) 2,2'',6,6''-Tetrabromo-decafluoro-1,3-terphenyl

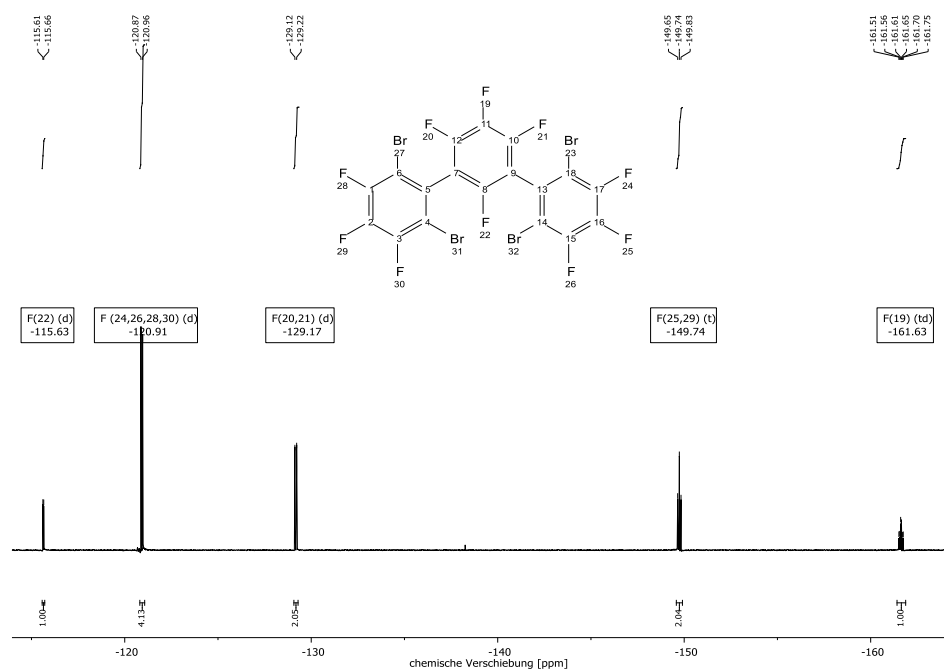

Figure S2:  $^{19}\text{F}$ -NMR of 2,2'',6,6''-Tetrabromo-decafluoro-1,3-terphenyl.

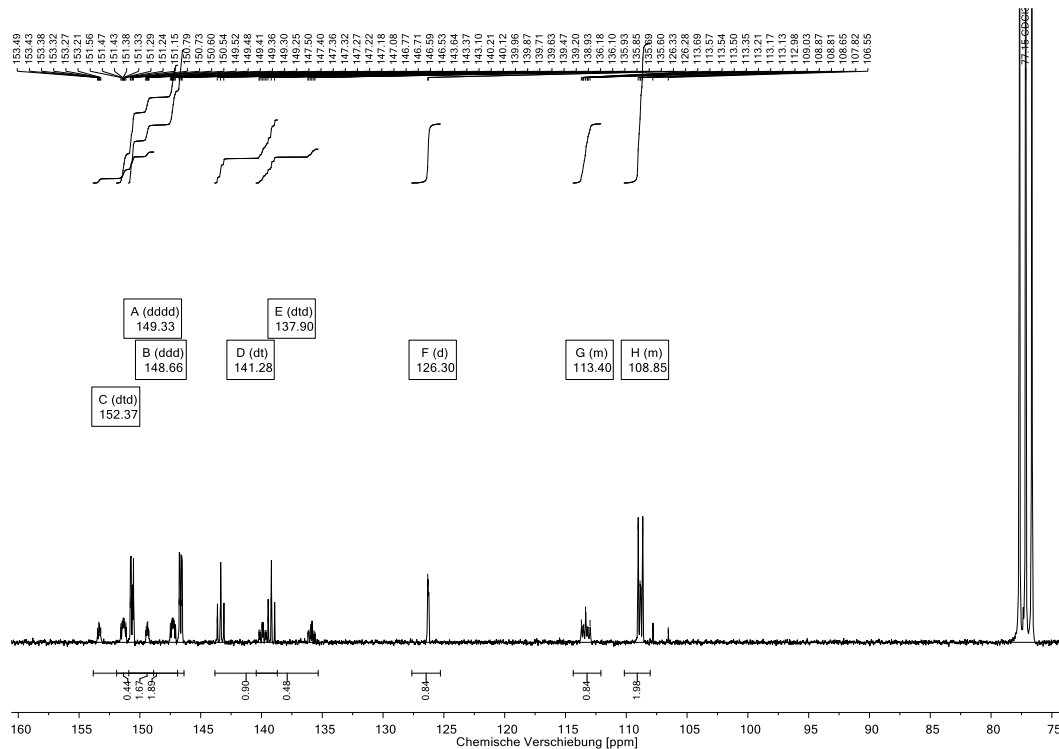

Figure S3:  $^{13}\text{C}$ -NMR of 2,2'',6,6''-Tetrabromo-decafluoro-1,3-terphenyl.

C.2.) 2,2'',6,6''-Tetrabromo-decafluoro-1,4-terphenyl

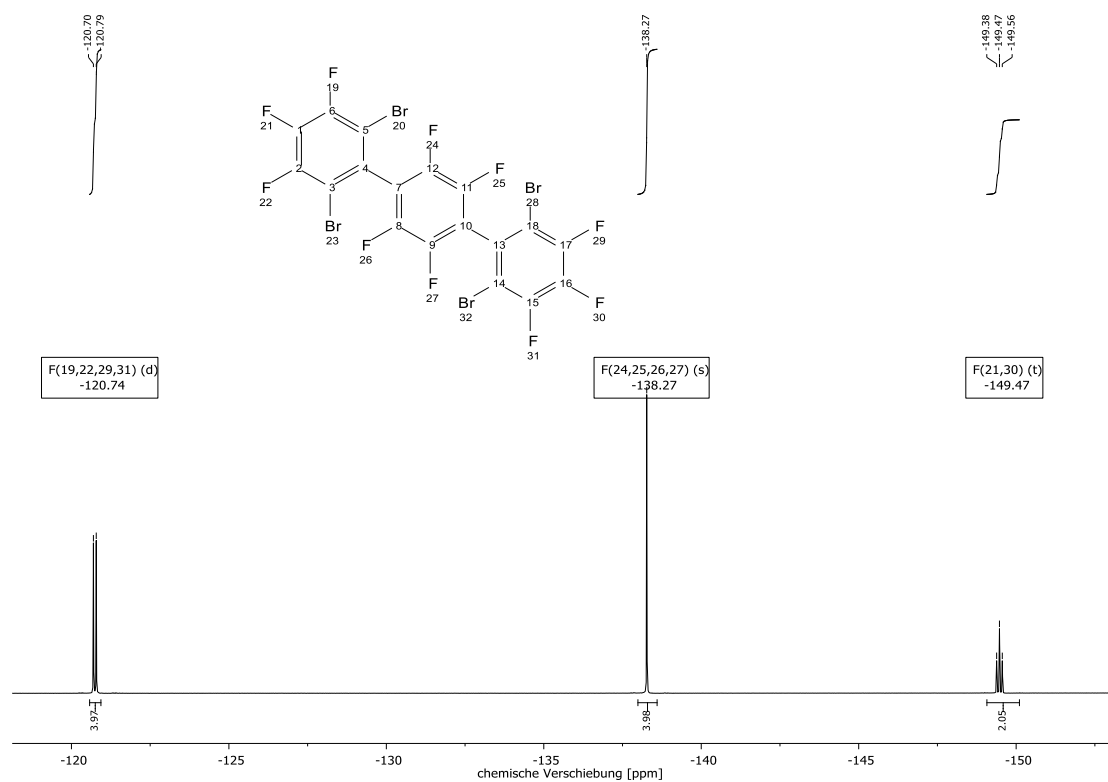

Figure S4:  $^{19}\text{F}$ -NMR of 2,2'',6,6''-Tetrabromo-decafluoro-1,4-terphenyl.

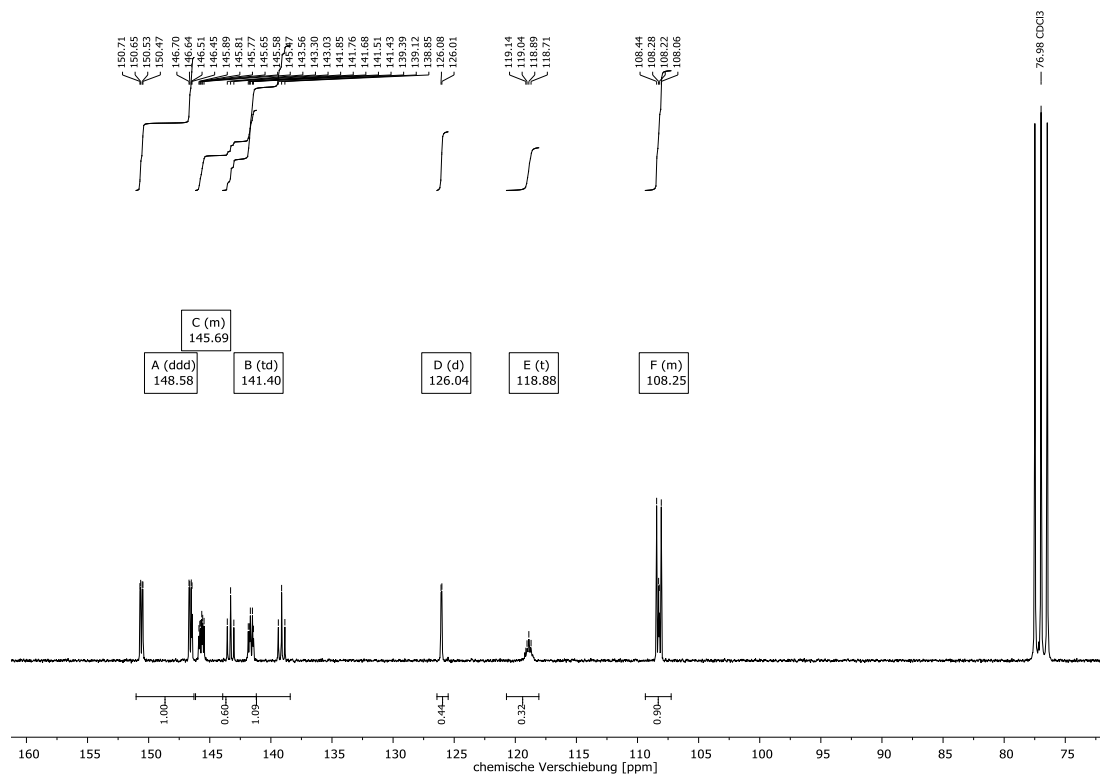

Figure S5:  $^{13}\text{C}$ -NMR of 2,2'',6,6''-Tetrabromo-decafluoro-1,4-terphenyl.

C.3.) *syn*-2,2''-Dibromo-dodecafluoro-1,4-terphenyl  
*anti*-2,2''-Dibromo-dodecafluoro-1,4-terphenyl

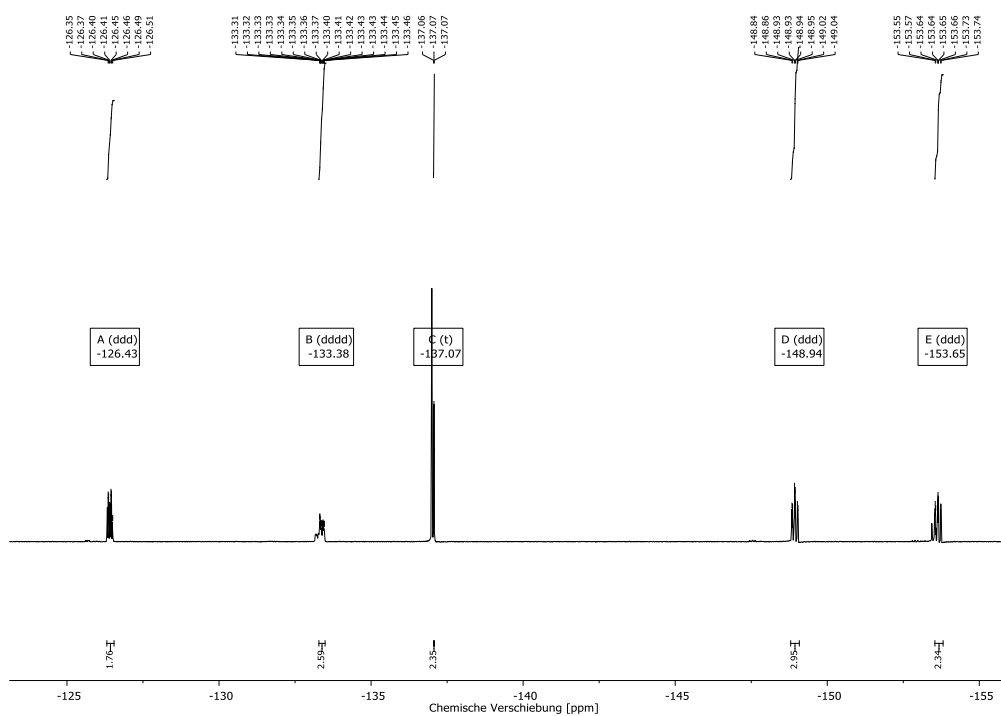

Figure S6:  $^{19}\text{F}$ -NMR presumable of *syn*-2,2''-Dibromo-dodecafluoro-1,4-terphenyl.

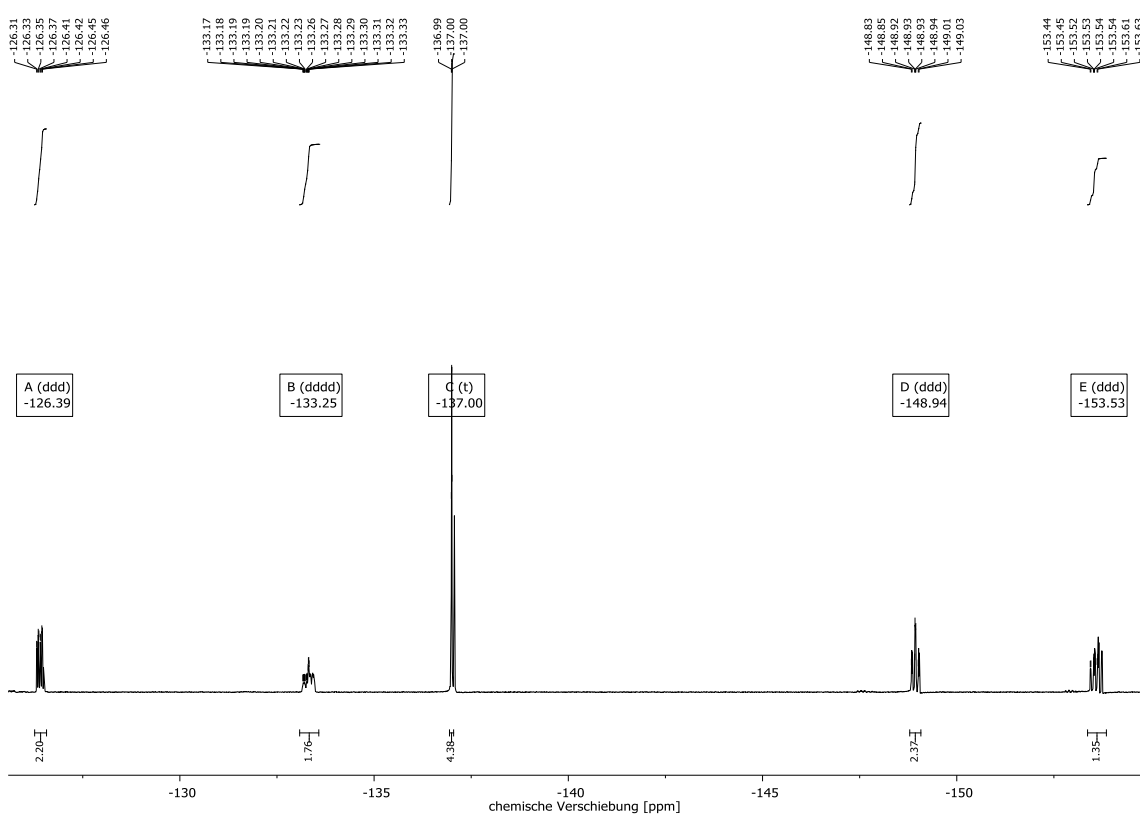

Figure S7:  $^{19}\text{F}$ -NMR presumable of *anti*-2,2''-Dibromo-dodecafluoro-1,4-terphenyl.



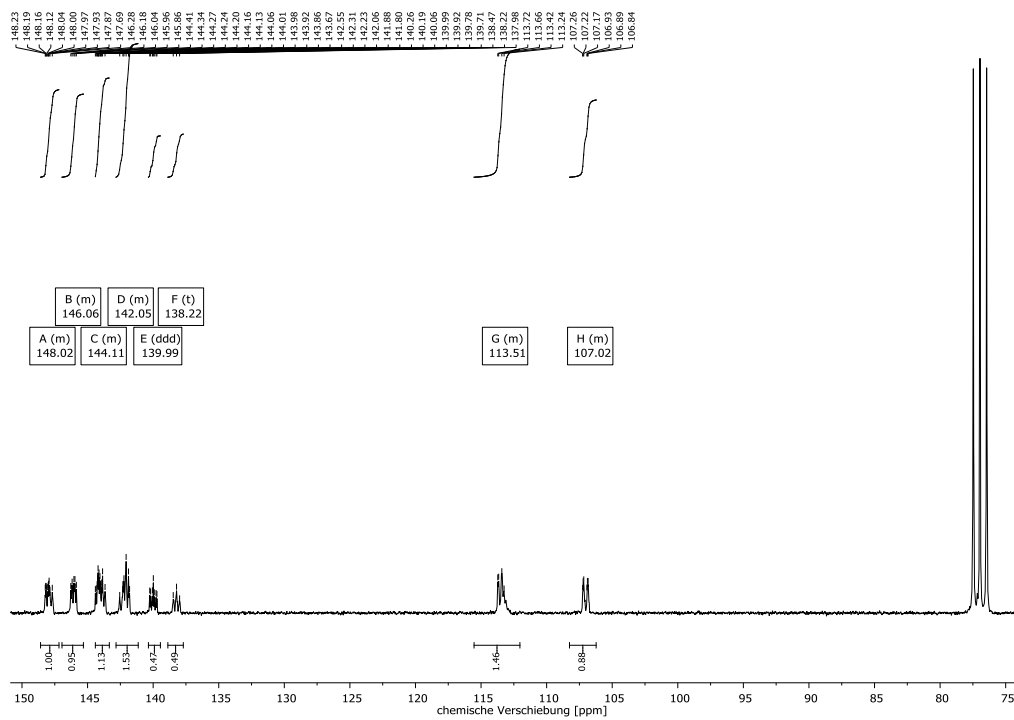

Figure S8:  $^{13}\text{C}$ -NMR of the mixture *syn*-/*anti*-2,2''-Dibromo-dodecafluoro-1,4-terphenyl.

C.4.) 1,3,5-Tris-(2,6-dibromo-3,4,5-trifluorophenyl)-2,4,6-trifluorobenzene

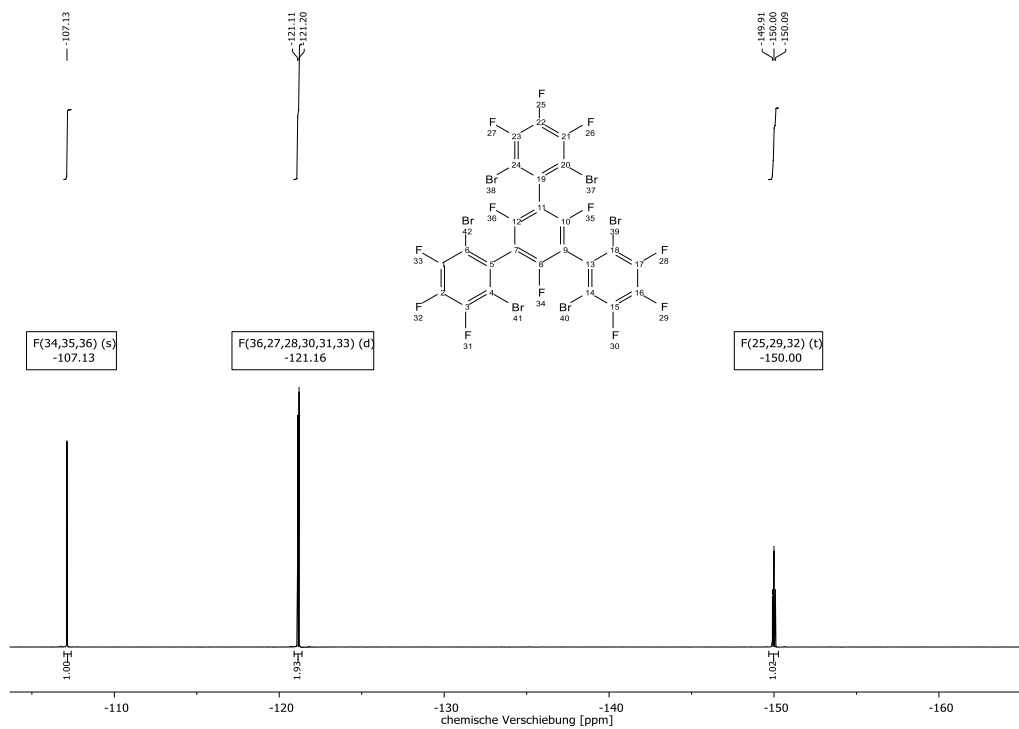

Figure S9:  $^{19}\text{F}$ -NMR 1,3,5-Tris-(2,6-dibromo-3,4,5-trifluorophenyl)-2,4,6-trifluorobenzene.

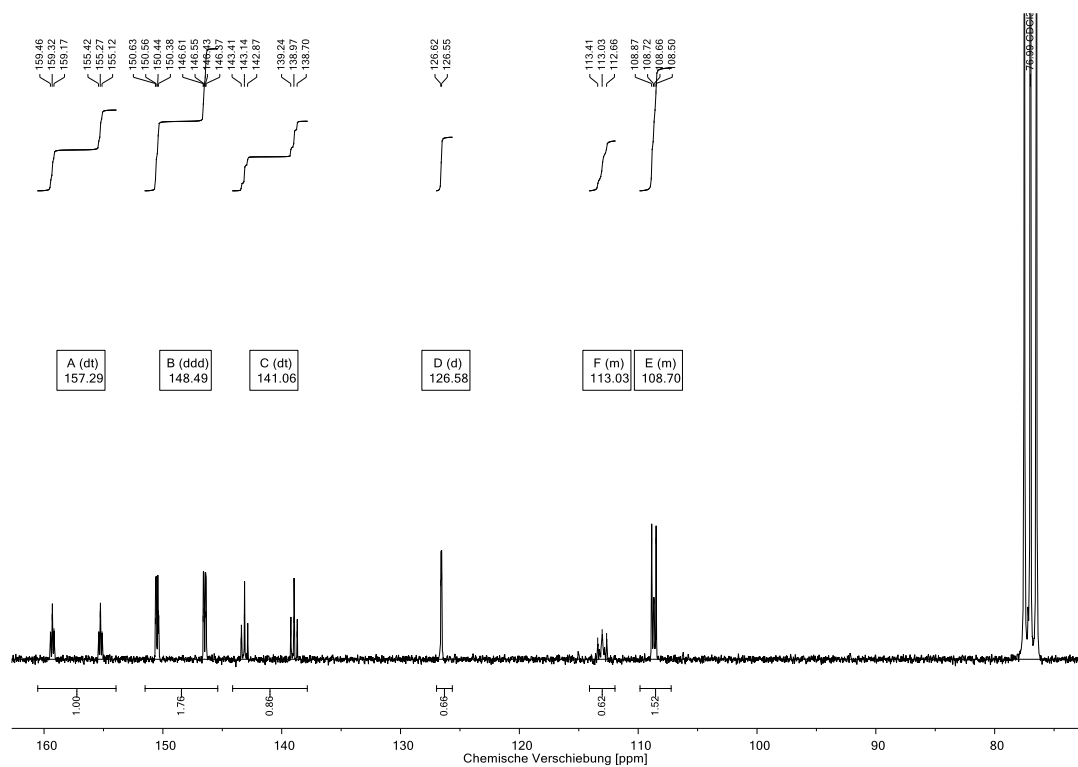

**Figure S10:**  $^{13}\text{C}$ -NMR 1,3,5-Tris-(2,6-dibromo-3,4,5-trifluorophenyl)-2,4,6-trifluorobenzene.

## D. 1) NMR-Titrations

### D 1.1) General information

#### Chemicals

All deuterated solvents were purchased from Deutero GmbH, dried and stored over molecular sieve.

#### General Procedure

For pipetting Hamilton® syringes were used. All experiments were conducted at room temperature and in Norell® 502 NMR-Tubes. The following concentrations were used for the corresponding Host and Guest solutions:

**Table S17:** Concentrations of the stock solutions of the different compounds used for titrations

| compound                                                                                                       | concentration [mM/L] |
|----------------------------------------------------------------------------------------------------------------|----------------------|
| 2,2",6,6"-Tetrabromo-decafluoro-1,3-terphenyl <i>m</i> -5 <sup>4Br</sup>                                       | 60.6                 |
| 2,2",6,6"-Tetrabromo-decafluoro-1,4-terphenyl <i>p</i> -5 <sup>4Br</sup>                                       | 60.6                 |
| 1,3,5-Tris-(2,6-dibromo-3,4,5-trifluorophenyl)-2,4,6-trifluorobenzene <i>m</i> -5 <sup>6Br</sup>               | 30.3                 |
| guest solutions for titrations with <i>m</i> -5 <sup>4Br</sup> and <i>p</i> -5 <sup>4Br</sup> (TBA-Cl, TOA-Br) | 501.6                |
| guest solutions for titrations with <i>m</i> -5 <sup>6Br</sup> (TBA-Cl, TOA-Br and orthoamide)                 | 250.8                |

As internal standard a solution of 1 µl of 1,3,5-trifluorobenzene in 1 ml of solvent was used. The NMR tube was filled with 100 µl of the host solution, 100 µl of the reference solution and filled to a total volume of 600 µl with solvent. For each measured point, a certain amount of Guest solution was added. The NMR-spectra were measured with a Bruker DPX-250. Each <sup>19</sup>F-NMR-spectra was measured with 32 scans. To determine the binding constants the displacements of the fluorine atoms in the ortho, para and meta positions to the bromine atom were observed relative to the signal of the standard. The measured shifts (Δ ppm) were plotted against the guest equivalents and the resulting curve was analyzed. For the analysis, the website [supramolecular.org](http://supramolecular.org)<sup>[5]</sup> was used.

### D 1.2.) Titrations results

**Table S18:** Binding constants and Gibbs free energies obtained from titrations of the bromine-based donors with different guests and binding constants of the iodinated analogues from previous works.<sup>[6]</sup> Due to the weak interaction of the bromine-based donors, a second binding event could not be detected, thus the second binding events of the iodinated donors are also not listed here. All Titrations were performed at 298.15 K.

| Donor                      | Guest      | Solvent     | K [M <sup>-1</sup> ]                      | $\Delta G$ [kcal/mol] |
|----------------------------|------------|-------------|-------------------------------------------|-----------------------|
| <i>m</i> -5 <sup>4Br</sup> | TBA-Cl     |             | 26.8 ± 0.5                                | -1.95 ± 0.01          |
|                            | TOA-Br     | THF         | 10.7 ± 1.3                                | -1.40 ± 0.07          |
|                            | TOA-I      |             | decomposition                             |                       |
| <i>m</i> -I <sup>4I</sup>  | TBA-Cl     |             | 1.5x10 <sup>4</sup> ± 3.0x10 <sup>3</sup> | -5.80 ± 0.11          |
|                            | TBA-Br     | THF         | 1.1x10 <sup>4</sup> ± 3.4x10 <sup>3</sup> | -5.60 ± 0.19          |
|                            | TOA-I      |             | 5.6x10 <sup>3</sup> ± 1.2x10 <sup>3</sup> | -5.20 ± 0.12          |
| <i>p</i> -5 <sup>4Br</sup> | TBA-Cl     |             | 15.4 ± 1.5                                | -1.62 ± 0.06          |
|                            | TOA-Br     | THF         | 17.4 ± 1.7                                | -1.70 ± 0.06          |
|                            | TOA-I      |             | decomposition                             |                       |
| <i>p</i> -I <sup>4I</sup>  | TBA-Cl     |             | 6.3x10 <sup>4</sup> ± 5.3x10 <sup>3</sup> | -6.65 ± 0.05          |
|                            | TBA-Br     | THF         | 7.3x10 <sup>4</sup> ± 6.2x10 <sup>3</sup> | -6.76 ± 0.05          |
|                            | TOA-I      |             | 1.7x10 <sup>4</sup> ± 9.3x10 <sup>2</sup> | -5.86 ± 0.03          |
| <i>m</i> -5 <sup>6Br</sup> | TBA-Cl     |             | 128 ± 18.4                                | -2.9 ± 0.09           |
|                            | TOA-Br     | THF         | 290.5 ± 50.1                              | -3.38 ± 0.16          |
|                            | TOA-I      |             | decomposition                             |                       |
|                            | Orthoamide | Cyclohexane | 24.4 ± 1.3                                | -1.9 ± 0.03           |
| <i>m</i> -I <sup>6I</sup>  | TBA-Cl     |             | 5.0x10 <sup>5</sup> ± 4.0x10 <sup>5</sup> | -7.8 ± 0.6            |
|                            | TBA-Br     | THF         | 4.1x10 <sup>5</sup> ± 3.2x10 <sup>5</sup> | -7.7 ± 0.5            |
|                            | TOA-I      |             | 1.4x10 <sup>5</sup>                       | -6.9 ± 0.8            |
| <i>m</i> -I <sup>3I</sup>  | Orthoamide | Cyclohexane | 5.8x10 <sup>3</sup>                       | -5.1                  |

**Scheme S1:** “Orthoamide” used as neutral guest for recognition titrations.

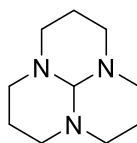

6

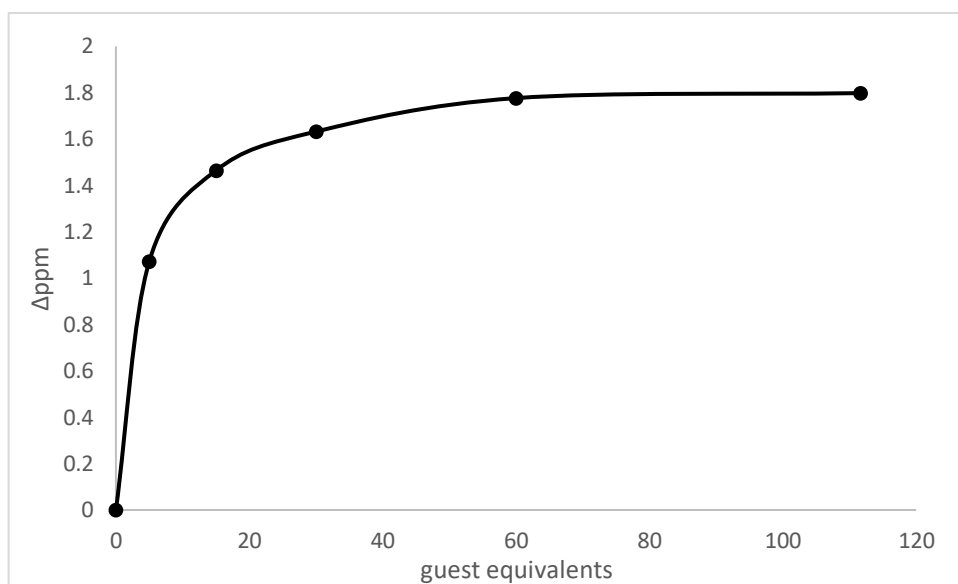

**Figure S11:** Titration of  $m\text{-}5^{4\text{Br}}$  with TBA-Cl.

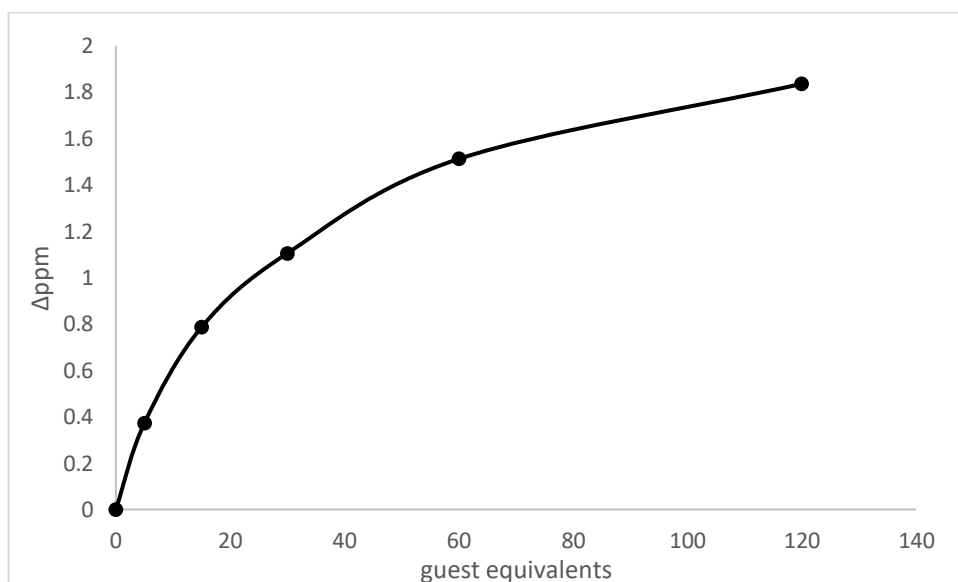

**Figure S12:** Titration of  $m\text{-}5^{4\text{Br}}$  with TBA-Br.

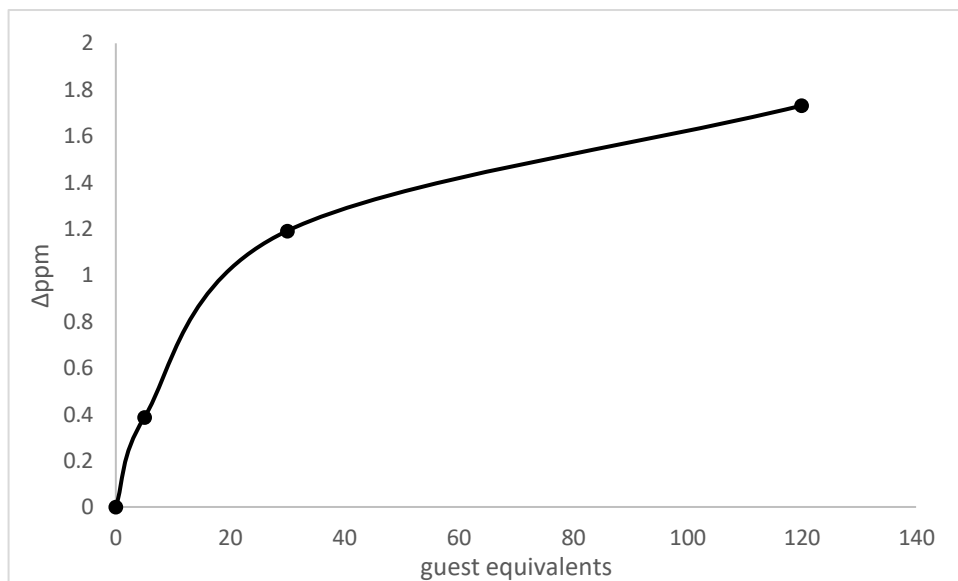

**Figure S13:** Titration of  $p\text{-}5^{4\text{Br}}$  with TBA-Cl.

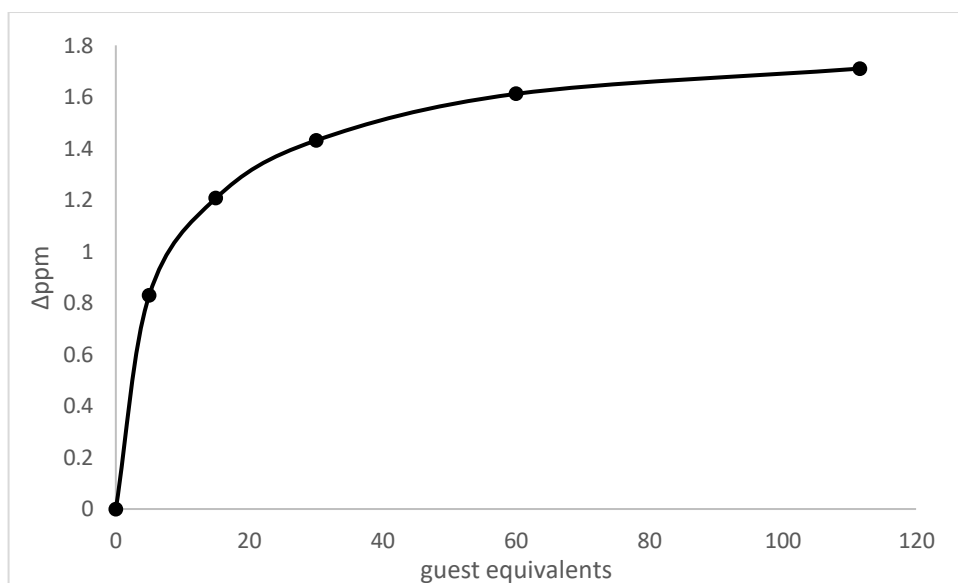

**Figure S14:** Titration of  $p\text{-}5^{4\text{Br}}$  with TBA-Br.

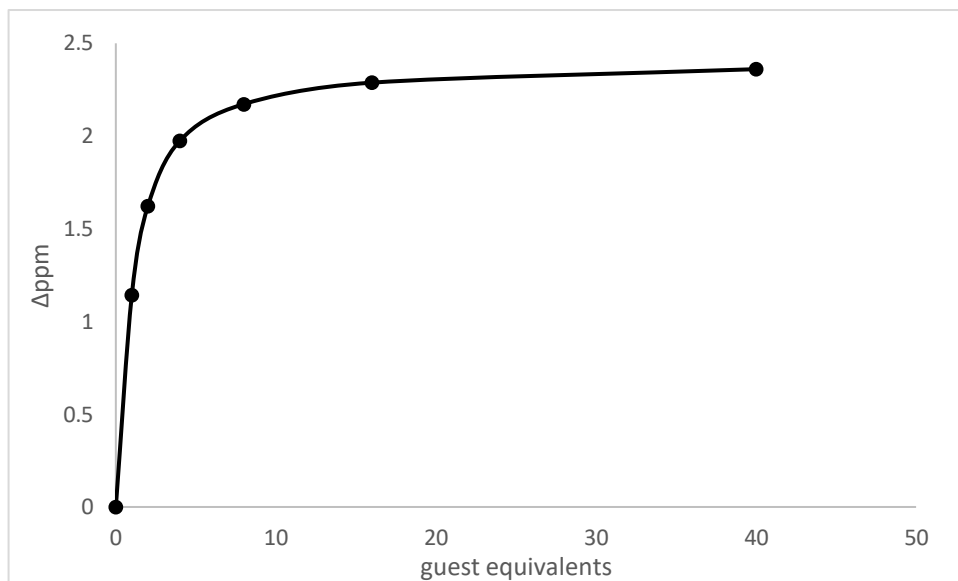

**Figure S15:** Titration of  $m\text{-}5^{6\text{Br}}$  with TBA-Cl.

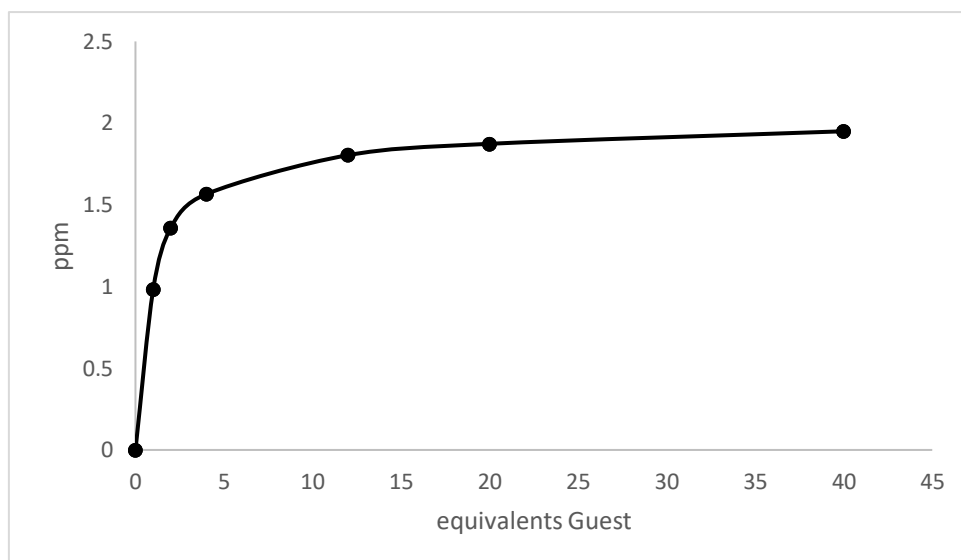

**Figure S16:** Titration of  $m\text{-}5^{6\text{Br}}$  with TBA-Br.

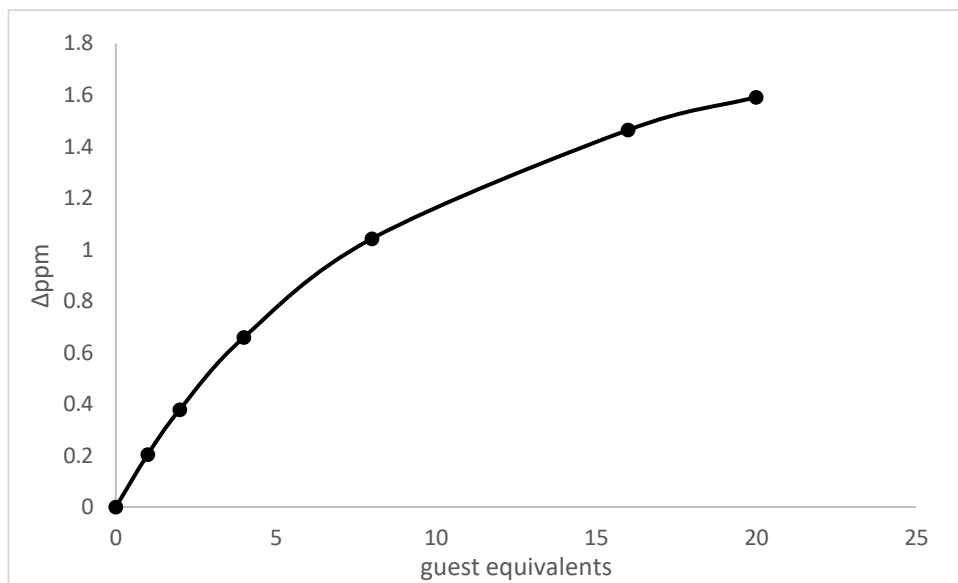

**Figure S17:** Titration of *m*-5<sup>6</sup>Br with Orthoamide 6.



## **E.1) DFT Calculation Data**

The halogen-bonded complexes were modelled by density functional theory using M06-2X<sup>[7]</sup> functional with the triple-zeta def2-TZVPP basis set (including the corresponding pseudopotential for iodine)<sup>[8]</sup>. All geometries were fully optimized, and the nature of the minima was confirmed by the absence of relevant imaginary frequencies. Free energy values *G* refer to the Gibbs free energy in hartree, as provided in the Gaussian09 output.

Coordinates are provided in separate SI files (halogen bonding interactions details can be found in the manuscript)

## F.) References

- [1] Oxford Diffraction /Agilent Technologies UK Ltd, Agilent 2011 CrysAlis PRO, Yarnton, England.
- [2] L. Farrugia, *J Appl Crystallogr* **1999**, *32*, 837.
- [3] G. Sheldrick, *Acta Crystallogr A*. **2008**, *64*, 112.
- [4] Crystal Impact - H. Putz & K. Brandenburg GbR, DIAMOND 2.1d, Kreuzherrenstr. 102, 53227 Bonn, Germany, 2000.
- [5] Supramolecular.org
- [6] S. H. Jungbauer, S. Schindler, E. Herdtweck, S. Keller, S. M. Huber, *Chem - Eur J*. **2015**, *21*, 13625.
- [7] Y. Zhao, D. G. Truhlar, *Theor. Chem. Acc.* **2008**, *120*, 215.
- [8] a) F. Weigend, R. Ahlrichs, *Phys Chem Chem Phys* **2005**, *7*, 3297; b) K. A. Peterson, D. Figgen, E. Goll, H. Stoll, M. Dolg, *J. Chem. Phys.* **2003**, *119*, 11113.
